# Supplementary material for: Screening and Selection of Drought-Tolerant High-Yielding Chickpea Genotypes Based on Physio-Biochemical Selection Indices and Yield Trials
Source: MDPI journal article supplement (doi:10.3390/life13061405), 2023-06-17
Supplement: s1 [file s1]

Supplementary Material Table S1. Details of the 40 chickpea genotypes used for present study.

| S. No. | Genotype Name | Status                               | Pedigree                                | Source              |
|--------|---------------|--------------------------------------|-----------------------------------------|---------------------|
| 1      | ICC4958       | National check for drought tolerance | JGC 4958                                | JNKVV, Jabalpur     |
| 2      | JAKI9218      | Released variety                     | (ICCC 37 x GW5/7) x ICCV 107            | JNKVV, Jabalpur     |
| 3      | JG11          | Released variety                     | (Phule G-5 x Narsinghpur bold) x ICC 37 | JNKVV, Jabalpur     |
| 4      | JG16          | Released variety                     | ICCC 44 x ICCV 10                       | JNKVV, Jabalpur     |
| 5      | JG63          | Released variety                     | Single Plant selection from JG 62       | JNKVV, Jabalpur     |
| 6      | JG74          | Released variety                     | A composite from genetic stock          | JNKVV, Jabalpur     |
| 7      | JG6           | Released variety                     | (ICCV10XK850) x (H208XRS11)             | JNKVV, Jabalpur     |
| 8      | JG14          | Released variety                     | (GW5/7XP326) XICCL83149                 | JNKVV, Jabalpur     |
| 9      | JG17          | Released variety                     | BDNG 9-3 x Narshingpur Bold             | JNKVV, Jabalpur     |
| 10     | JG24          | Released variety                     | (JG 74 x ICC 4958)-21                   | JNKVV, Jabalpur     |
| 11     | JG28          | Released variety                     | [(JM – 1 X IPC 9239) X JG 7] – 14-11    | JNKVV, Jabalpur     |
| 12     | JG32          | Released variety                     | [(JM – 1 x IPC 4958) x JG 315] – 2      | JNKVV, Jabalpur     |
| 13     | JG33          | Released variety                     | [(JM – 1 x IPC 9239) x JG 322] – 30-3   | JNKVV, Jabalpur     |
| 14     | JG36          | Released variety                     | JG 12 x JG 16                           | JNKVV, Jabalpur     |
| 15     | JG42          | Released variety                     | [(JM 1x IPC 9239) JG7] 14-11-2011-42    | JNKVV, Jabalpur     |
| 16     | JG226         | Released variety                     | JG 74 x JG315                           | JNKVV, Jabalpur     |
| 17     | JG205         | Released variety                     | JG 315 x ICC 96029                      | JNKVV, Jabalpur     |
| 18     | ICCV15102     | Released variety                     | ICCV03112 x ICCV10                      | ICRISAT, Patancheru |
| 19     | ICCV15115     | Released variety                     | ICCV10 x ICCV 96970                     | ICRISAT, Patancheru |
| 20     | ICCV15118     | Released variety                     | ICCV 05530 x ICCV 88510                 | ICRISAT, Patancheru |
| 21     | ICCV19616     | Released variety                     | JAKI 9218/ICCV 05103                    | ICRISAT, Patancheru |
| 22     | ICCV181664    | Released variety                     | ICC 4958 TM/JG 130                      | ICRISAT, Patancheru |
| 23     | JG2003-14-16  | Advanced breeding line               | [(JM1 x ICC4929) x ICC4958]-2-14-16     | JNKVV, Jabalpur     |
| 24     | JG2016-44     | Advanced breeding line               | (ICC 96029 x ICC11551) 44               | JNKVV, Jabalpur     |

|    |               |                        |                                                          |                 |
|----|---------------|------------------------|----------------------------------------------------------|-----------------|
| 25 | JG2016-45     | Advanced breeding line | (JG 74 x ICC11551) 45                                    | JNKVV, Jabalpur |
| 26 | JG2016-1411   | Advanced breeding line | JG 14 x JG 11                                            | JNKVV, Jabalpur |
| 27 | JG2016-1614   | Advanced breeding line | JG 16 x JG 14                                            | JNKVV, Jabalpur |
| 28 | JG2016-9605   | Advanced breeding line | JG 74 x ICC 96029                                        | JNKVV, Jabalpur |
| 29 | JG2016-9651   | Advanced breeding line | JG 130 x ICC 96029                                       | JNKVV, Jabalpur |
| 30 | JG2016-74315  | Advanced breeding line | [{(JG 74 x WR 315) x JG 74} -2010 -1- 3- 5- 11-15-10-2 ] | JNKVV, Jabalpur |
| 31 | JG2016-634958 | Advanced breeding line | JG 63 x ICC 4958                                         | JNKVV, Jabalpur |
| 32 | JG2016-921814 | Advanced breeding line | JAKI 9218 x JG 14                                        | JNKVV, Jabalpur |
| 33 | JG2017-48     | Advanced breeding line | (JG 315 x ICC 96029)48                                   | JNKVV, Jabalpur |
| 34 | JG2018-51     | Advanced breeding line | JG63 x ICC1205                                           | JNKVV, Jabalpur |
| 35 | JG2022-74     | Advanced breeding line | JG12XJG74                                                | JNKVV, Jabalpur |
| 36 | JG2016-36     | Advanced breeding line | JG12XJG16-1                                              | JNKVV, Jabalpur |
| 37 | JG2022-75     | Advanced breeding line | JG12XICC4958                                             | JNKVV, Jabalpur |
| 38 | JG2021-6301   | Advanced breeding line | JG12 X ICCV06301                                         | JNKVV, Jabalpur |
| 39 | JG2021-1424   | Advanced breeding line | JG14XJG24                                                | JNKVV, Jabalpur |
| 40 | JG2021-1617   | Advanced breeding line | JG16 X JG17                                              | JNKVV, Jabalpur |

Supplementary Material Table S2. Pooled physiological responses of various chickpea genotypes under normal irrigated condition.

| Genotypes     | RWC                          | CTD                       | SLA                       | Ci                            | Pn                            | gs                         | Tr                            |
|---------------|------------------------------|---------------------------|---------------------------|-------------------------------|-------------------------------|----------------------------|-------------------------------|
| ICC4958       | 77.35±2.23 <sup>mnop</sup>   | 3.79±0.01 <sup>s</sup>    | 180.5±1.39 <sup>de</sup>  | 208.02±3.33 <sup>ijklmn</sup> | 19.34±0.96 <sup>hijklmn</sup> | 0.32±0.02 <sup>hijk</sup>  | 14.93±1.33 <sup>fghijkl</sup> |
| ICCV15102     | 73.49±0.83 <sup>ghijkl</sup> | 3.5±0.01 <sup>o</sup>     | 215.83±2.9 <sup>i</sup>   | 181.86±5.87 <sup>defg</sup>   | 17.71±0.49 <sup>defg</sup>    | 0.29±0.01 <sup>defg</sup>  | 13.42±0.73 <sup>cdef</sup>    |
| ICCV15115     | 79.19±0.61 <sup>op</sup>     | 3.32±0.03 <sup>lmn</sup>  | 253.73±2.83 <sup>q</sup>  | 204.73±17.66 <sup>ijklm</sup> | 20.87±0.87 <sup>no</sup>      | 0.34±0.02 <sup>lmn</sup>   | 16.14±0.84 <sup>ijklm</sup>   |
| ICCV15118     | 76.96±1.92 <sup>mnop</sup>   | 3±0.02 <sup>g</sup>       | 228.95±2.37 <sup>jk</sup> | 197.61±4.15 <sup>hijkl</sup>  | 20.49±0.83 <sup>lmno</sup>    | 0.34±0.02 <sup>iklm</sup>  | 15.79±1.24 <sup>hijklm</sup>  |
| ICCV181664    | 78.76±2.11 <sup>op</sup>     | 2.83±0.02 <sup>d</sup>    | 228.95±1.74 <sup>jk</sup> | 220.88±7.72 <sup>no</sup>     | 21.59±0.9 <sup>opq</sup>      | 0.36±0.02 <sup>mno</sup>   | 17.39±1.74 <sup>mn</sup>      |
| ICCV19616     | 67±1.86 <sup>abc</sup>       | 3.62±0.02 <sup>p</sup>    | 180.34±1.64 <sup>de</sup> | 167.9±8.45 <sup>abcd</sup>    | 16.53±0.74 <sup>abcd</sup>    | 0.27±0.01 <sup>abcd</sup>  | 14.38±1.02 <sup>defghij</sup> |
| JAKI9218      | 77.64±4.03 <sup>mnop</sup>   | 3.63±0.02 <sup>pq</sup>   | 210.71±4.86 <sup>h</sup>  | 220.05±3.98 <sup>no</sup>     | 21.03±0.67 <sup>nop</sup>     | 0.35±0.01 <sup>lmn</sup>   | 16.5±0.81 <sup>klm</sup>      |
| JG11          | 79.32±1.26 <sup>op</sup>     | 4.04±0.09 <sup>u</sup>    | 196.98±3.26 <sup>fg</sup> | 214.83±3.97 <sup>mno</sup>    | 20.96±0.82 <sup>nop</sup>     | 0.34±0.02 <sup>lmn</sup>   | 15.01±1.15 <sup>fghijkl</sup> |
| JG14          | 72.95±1.26 <sup>fghijk</sup> | 3.48±0.01 <sup>o</sup>    | 239.66±4.01 <sup>mn</sup> | 194.29±4.28 <sup>ghij</sup>   | 19.26±0.54 <sup>hijklm</sup>  | 0.32±0.01 <sup>hijk</sup>  | 14.17±0.29 <sup>defghi</sup>  |
| JG16          | 77.18±2.34 <sup>mnop</sup>   | 3.93±0.01 <sup>t</sup>    | 170.11±1.62 <sup>c</sup>  | 214.36±6.03 <sup>mno</sup>    | 20.73±0.39 <sup>mno</sup>     | 0.34±0.01 <sup>lmn</sup>   | 15.06±1.14 <sup>fghijkl</sup> |
| JG17          | 70.84±1.06 <sup>defg</sup>   | 3.45±0.02 <sup>o</sup>    | 242.96±6.28 <sup>n</sup>  | 180.64±0.95 <sup>cdefg</sup>  | 17.58±0.26 <sup>defg</sup>    | 0.29±0.01 <sup>cdef</sup>  | 12.78±0.38 <sup>bcde</sup>    |
| JG2003-14-16  | 78.51±0.12 <sup>nop</sup>    | 3.24±0.04 <sup>jk</sup>   | 255.43±4.87 <sup>q</sup>  | 209.7±10.63 <sup>klmn</sup>   | 20.61±1.06 <sup>lmno</sup>    | 0.34±0.02 <sup>klm</sup>   | 14.53±0.35 <sup>efghijk</sup> |
| JG2016-1411   | 75.91±1.6 <sup>klmnop</sup>  | 2.87±0.06 <sup>de</sup>   | 147.32±2.12 <sup>b</sup>  | 211.65±11.27 <sup>lmno</sup>  | 20.07±0.81 <sup>ijklmn</sup>  | 0.33±0.02 <sup>ijkl</sup>  | 15.21±1.37 <sup>fghijkl</sup> |
| JG2016-1614   | 66.18±2.12 <sup>ab</sup>     | 3.25±0.02 <sup>kl</sup>   | 176.19±1.06 <sup>d</sup>  | 166.86±6.78 <sup>abc</sup>    | 16.35±0.82 <sup>abcd</sup>    | 0.27±0.02 <sup>abcd</sup>  | 11.2±0.72 <sup>ab</sup>       |
| JG2016-36     | 65.2±0.58 <sup>a</sup>       | 2.84±0.03 <sup>d</sup>    | 210.48±4.35 <sup>h</sup>  | 169.45±5.66 <sup>abcd</sup>   | 16.44±0.34 <sup>abcd</sup>    | 0.27±0.01 <sup>abcd</sup>  | 11.33±0.63 <sup>ab</sup>      |
| JG2016-44     | 78.09±0.75 <sup>mnop</sup>   | 3.26±0.08 <sup>iklm</sup> | 193.38±1.52 <sup>f</sup>  | 209.35±2.49 <sup>klmn</sup>   | 22.79±1.23 <sup>q</sup>       | 0.38±0.02 <sup>o</sup>     | 18.76±1.86 <sup>n</sup>       |
| JG2016-45     | 68.6±1.63 <sup>abcd</sup>    | 2.75±0.03 <sup>c</sup>    | 194.42±3.16 <sup>f</sup>  | 160.83±9.42 <sup>a</sup>      | 16.06±0.5a <sup>bc</sup>      | 0.26±0.01 <sup>abc</sup>   | 10.79±0.74 <sup>a</sup>       |
| JG2016-634958 | 75.96±5.05 <sup>klmnop</sup> | 2.93±0.03 <sup>ef</sup>   | 198.35±1.36 <sup>fg</sup> | 211.65±15.59 <sup>lmno</sup>  | 20.88±1.84 <sup>no</sup>      | 0.35±0.03 <sup>lmn</sup>   | 16.06±1.57 <sup>hijklm</sup>  |
| JG2016-74315  | 71.97±2.25 <sup>defghi</sup> | 3.05±0.07 <sup>g</sup>    | 233.09±3.29 <sup>kl</sup> | 182.52±10.93 <sup>defg</sup>  | 17.32±0.86 <sup>bcdef</sup>   | 0.28±0.02 <sup>bcdef</sup> | 12.65±0.78 <sup>abcde</sup>   |
| JG2016-921814 | 72.35±1.44 <sup>efghij</sup> | 2.95±0.02 <sup>f</sup>    | 234.37±3.5 <sup>lm</sup>  | 196.6±6.86 <sup>hijk</sup>    | 18.63±0.53 <sup>fghi</sup>    | 0.31±0.01 <sup>fghi</sup>  | 14.72±0.48 <sup>fghijk</sup>  |
| JG2016-9605   | 67.17±0.82 <sup>abc</sup>    | 2.61±0.06 <sup>a</sup>    | 226.9±2.97 <sup>i</sup>   | 172.89±3 <sup>abcde</sup>     | 16.41±0.26 <sup>abcd</sup>    | 0.27±0.01 <sup>abcd</sup>  | 11.18±1.6 <sup>ab</sup>       |
| JG2016-9651   | 69.95±0.85 <sup>cdefg</sup>  | 3.28±0.04 <sup>klm</sup>  | 200.68±2.37 <sup>g</sup>  | 180.03±9.48 <sup>cdefg</sup>  | 17.69±0.03 <sup>defg</sup>    | 0.29±0 <sup>defg</sup>     | 12.5±0.9 <sup>abcd</sup>      |
| JG2017-48     | 66.45±1.29 <sup>abc</sup>    | 3.7±0.01 <sup>qr</sup>    | 217.68±1.46 <sup>i</sup>  | 165.19±4.37 <sup>ab</sup>     | 15.99±0.49 <sup>ab</sup>      | 0.26±0.01 <sup>ab</sup>    | 10.78±0.92 <sup>a</sup>       |
| JG2018-51     | 72.14±1.65 <sup>defghi</sup> | 3.71±0.01 <sup>r</sup>    | 221.14±2.28 <sup>i</sup>  | 185.58±1.92 <sup>efgh</sup>   | 18.14±0.72 <sup>efgh</sup>    | 0.3±0.02 <sup>efgh</sup>   | 14.05±0.48 <sup>defgh</sup>   |
| JG2021-1424   | 69.81±1.52 <sup>cdef</sup>   | 3.36±0.04 <sup>n</sup>    | 235.42±3.85 <sup>lm</sup> | 188.88±1.44 <sup>fgh</sup>    | 18.18±0.29 <sup>fgh</sup>     | 0.3±0.01 <sup>efgh</sup>   | 12.67±0.8 <sup>abcde</sup>    |
| JG2021-1617   | 66.92±1.9 <sup>abc</sup>     | 2.99±0.13 <sup>fg</sup>   | 216.37±2.37 <sup>i</sup>  | 169.31±8.91 <sup>abcd</sup>   | 16.73±0.74 <sup>abcde</sup>   | 0.28±0.01 <sup>abcde</sup> | 11.81±0.72 <sup>abc</sup>     |
| JG2021-6301   | 69.23±2.13 <sup>bcde</sup>   | 3.13±0.04 <sup>h</sup>    | 167.76±4.42 <sup>c</sup>  | 180.45±7.27 <sup>cdefg</sup>  | 17.77±0.89 <sup>defg</sup>    | 0.29±0.02 <sup>defg</sup>  | 12.65±0.81 <sup>abcde</sup>   |
| JG2022-74     | 68.7±0.62 <sup>abcd</sup>    | 3.45±0.02 <sup>o</sup>    | 182.99±2.39 <sup>e</sup>  | 170.45±6.91 <sup>abcd</sup>   | 16.48±0.32 <sup>abcd</sup>    | 0.27±0.01 <sup>abcd</sup>  | 10.93±0.9 <sup>ab</sup>       |
| JG2022-75     | 66.1±0.59 <sup>ab</sup>      | 3.15±0.04 <sup>hi</sup>   | 248.26±3.45 <sup>op</sup> | 162.15±0.44 <sup>ab</sup>     | 15.5±0.3 <sup>a</sup>         | 0.25±0.01 <sup>a</sup>     | 11.11±0.47 <sup>ab</sup>      |

|             |                              |                          |                           |                               |                              |                            |                               |
|-------------|------------------------------|--------------------------|---------------------------|-------------------------------|------------------------------|----------------------------|-------------------------------|
| JG226       | 77.15±2.94 <sup>mnop</sup>   | 3.02±0.01 <sup>g</sup>   | 175.25±1.51 <sup>d</sup>  | 209.06±10.4 <sup>klmn</sup>   | 20.41±0.96 <sup>lmno</sup>   | 0.34±0.02 <sup>iklm</sup>  | 15.53±0.1 <sup>ghijklm</sup>  |
| JG24        | 79.51±1.66 <sup>p</sup>      | 3.33±0.01 <sup>mn</sup>  | 239.33±3.74 <sup>mn</sup> | 218.86±6.66 <sup>mno</sup>    | 21.2±0.7 <sup>nop</sup>      | 0.35±0.01 <sup>lmn</sup>   | 16.54±0.77 <sup>klm</sup>     |
| JG28        | 75.75±1.07 <sup>klmno</sup>  | 3.3±0.04 <sup>klmn</sup> | 242.84±3.83 <sup>n</sup>  | 207.83±5.44 <sup>ijklmn</sup> | 19.98±0.47 <sup>ijklmn</sup> | 0.33±0.01 <sup>ijkl</sup>  | 15.32±0.73 <sup>fghijkl</sup> |
| JG32        | 74.45±1.02 <sup>hijklm</sup> | 3.2±0.02 <sup>ij</sup>   | 238.78±1.72 <sup>mn</sup> | 191.08±2.9 <sup>ghi</sup>     | 18.71±0.4 <sup>fghij</sup>   | 0.31±0.01 <sup>fghi</sup>  | 14.47±0.72 <sup>defghij</sup> |
| JG33        | 71.43±2.2 <sup>defgh</sup>   | 3.89±0.04 <sup>t</sup>   | 253±2.68 <sup>pq</sup>    | 176.17±11.8 <sup>bcdef</sup>  | 17.46±0.78 <sup>cdef</sup>   | 0.28±0.02 <sup>bcdef</sup> | 13.58±1.88 <sup>cdefg</sup>   |
| JG36        | 75.01±0.25 <sup>ijklmn</sup> | 3.14±0.03 <sup>hi</sup>  | 147.17±1.63 <sup>b</sup>  | 219.81±1.86 <sup>no</sup>     | 20.03±0.32 <sup>ijklmn</sup> | 0.33±0.01 <sup>iklm</sup>  | 15.98±0.6 <sup>hijklm</sup>   |
| JG42        | 74.9±0.76 <sup>hijklmn</sup> | 2.94±0.02 <sup>ef</sup>  | 176.83±2.88 <sup>d</sup>  | 197.08±3.91 <sup>hijkl</sup>  | 18.58±0.42 <sup>fgh</sup>    | 0.31±0.01 <sup>fghi</sup>  | 15.29±0.81 <sup>fghijkl</sup> |
| JG6         | 75.99±1.8 <sup>lmnop</sup>   | 3.62±0.03 <sup>p</sup>   | 148.88±2.46 <sup>b</sup>  | 199.45±2.26 <sup>hijkl</sup>  | 18.94±0.5 <sup>ghijk</sup>   | 0.31±0.01 <sup>ghij</sup>  | 14.75±1.01 <sup>fghijkl</sup> |
| JG63        | 78.83±2.3 <sup>op</sup>      | 3.66±0.02 <sup>pqr</sup> | 115.42±1.74 <sup>a</sup>  | 217.15±14.12 <sup>mno</sup>   | 20.85±1.37 <sup>no</sup>     | 0.34±0.02 <sup>lmn</sup>   | 16.74±1.58 <sup>lm</sup>      |
| JG74        | 77.59±2.19 <sup>mnop</sup>   | 2.65±0.02 <sup>ab</sup>  | 208.43±4.12 <sup>h</sup>  | 209.09±3.82 <sup>klmn</sup>   | 20.27±0.86 <sup>klmno</sup>  | 0.34±0.02 <sup>iklm</sup>  | 15.71±1.03 <sup>hijklm</sup>  |
| PG205       | 78.81±2.22 <sup>op</sup>     | 2.7±0.03 <sup>bc</sup>   | 244.23±3.41 <sup>no</sup> | 224.58±3.35 <sup>o</sup>      | 22.31±0.35 <sup>pq</sup>     | 0.37±0.01 <sup>no</sup>    | 16.32±0.67 <sup>iklm</sup>    |
| <b>Mean</b> | <b>73.48±4.77</b>            | <b>3.26±0.37</b>         | <b>207.48±34.42</b>       | <b>194.22±20.39</b>           | <b>18.92±2.05</b>            | <b>0.31±0.04</b>           | <b>14.22±2.2</b>              |

Data pooled for two successive seasons and presented as mean of triplicate ± standard deviation. Means with the same letter are not significantly different at 5% level. Where RWC, CTD, SLA, Ci, Pn, gs, Tr indicates for relative water content, canopy temperature depression, specific leaf area, internal CO<sub>2</sub> concentration, photosynthetic rate, stomatal conductance, and transpiration rate, respectively.

Supplementary Material Table S3. Physiological responses of various chickpea genotypes under terminal drought stressed condition.

| Genotypes     | RWC                         | CTD                     | SLA                        | Ci                               | Pn                           | gs                          | Tr                           |
|---------------|-----------------------------|-------------------------|----------------------------|----------------------------------|------------------------------|-----------------------------|------------------------------|
| ICC4958       | 74.23±1.96 <sup>nopqr</sup> | 2.11±0 <sup>st</sup>    | 136.79±1.64 <sup>h</sup>   | 172.05±10.33 <sup>ijkl</sup>     | 14.64±0.77 <sup>klmno</sup>  | 0.25±0.02 <sup>ijklmn</sup> | 12.01±0.54 <sup>ijklmn</sup> |
| ICCV15102     | 69.72±1.3 <sup>iklm</sup>   | 1.75±0.03 <sup>mn</sup> | 173.42±2.22 <sup>o</sup>   | 151.11±4.37 <sup>cdefgh</sup>    | 12.98±0.41 <sup>fgghi</sup>  | 0.22±0.01 <sup>efgh</sup>   | 12.15±0.56 <sup>efgh</sup>   |
| ICCV15115     | 74.34±1.46 <sup>opqr</sup>  | 1.39±0.02 <sup>d</sup>  | 146.43±1.26 <sup>i</sup>   | 181.33±4.33 <sup>iklmno</sup>    | 15.51±0.79 <sup>mnpq</sup>   | 0.26±0.02 <sup>lmnop</sup>  | 14.07±0.46 <sup>lmnop</sup>  |
| ICCV15118     | 72.29±2.26 <sup>lmnop</sup> | 1.64±0.01 <sup>hi</sup> | 169.61±2.08 <sup>o</sup>   | 164.84±2.76 <sup>ghijklmno</sup> | 15.64±0.77 <sup>nopq</sup>   | 0.26±0.02 <sup>lmnop</sup>  | 14.01±1.1 <sup>lmnop</sup>   |
| ICCV181664    | 72.90±1.57 <sup>mnpq</sup>  | 1.75±0.03 <sup>mn</sup> | 181.87±2.63 <sup>p</sup>   | 182.06±6.35 <sup>iklmno</sup>    | 15.89±0.76 <sup>opq</sup>    | 0.27±0.01 <sup>nop</sup>    | 13.35±0.13 <sup>nop</sup>    |
| ICCV19616     | 62.21±2.03 <sup>cde</sup>   | 2.18±0.01 <sup>v</sup>  | 131.21±1.66 <sup>ef</sup>  | 136.23±3.12 <sup>abcd</sup>      | 11.8±0.71 <sup>bcdef</sup>   | 0.2±0.01 <sup>bcde</sup>    | 13.51±4.93 <sup>bcde</sup>   |
| JAKI9218      | 74.74±0.63 <sup>pqrs</sup>  | 2.03±0.01 <sup>r</sup>  | 150.83±1.58 <sup>i</sup>   | 185.57±4.8 <sup>lmno</sup>       | 15.32±0.53 <sup>lmnopq</sup> | 0.26±0.01 <sup>lmnop</sup>  | 13.22±1.35 <sup>lmnop</sup>  |
| JG11          | 75.88±1.06 <sup>qrs</sup>   | 2.02±0.02 <sup>qr</sup> | 154.06±0.91 <sup>jk</sup>  | 184.7±9.9 <sup>lmno</sup>        | 15.64±0.8 <sup>nopq</sup>    | 0.26±0.02 <sup>lmnop</sup>  | 13.78±0.76 <sup>lmnop</sup>  |
| JG14          | 64.44±1.45 <sup>defgh</sup> | 1.14±0.01 <sup>b</sup>  | 180.22±3.33 <sup>p</sup>   | 164.92±5.23 <sup>ghi</sup>       | 13.9±0.52 <sup>hijk</sup>    | 0.24±0.01 <sup>ghijk</sup>  | 10.9±0.6 <sup>ghijk</sup>    |
| JG16          | 73.8±0.93 <sup>nopqr</sup>  | 2±0.02 <sup>q</sup>     | 111.65±0.5 <sup>d</sup>    | 171.19±6 <sup>ijkl</sup>         | 15.51±0.41 <sup>mnpq</sup>   | 0.26±0.01 <sup>lmnop</sup>  | 13.94±0.05 <sup>lmnop</sup>  |
| JG17          | 63.67±1.01 <sup>defg</sup>  | 2±0.01 <sup>q</sup>     | 160.6±4.35 <sup>mn</sup>   | 152.31±2.5 <sup>efgh</sup>       | 12.32±0.26 <sup>cdefg</sup>  | 0.21±0.01 <sup>cdef</sup>   | 11.01±0.58 <sup>cdef</sup>   |
| JG2003-14-16  | 72.37±2.37 <sup>lmnop</sup> | 1.61±0.02 <sup>h</sup>  | 189.74±4.26 <sup>qr</sup>  | 162.44±8.83 <sup>ghi</sup>       | 14.79±1 <sup>klmnop</sup>    | 0.25±0.02 <sup>ijklmn</sup> | 12.23±1.1 <sup>ijklmn</sup>  |
| JG2016-1411   | 73.06±1.94 <sup>mnpq</sup>  | 1.63±0.01 <sup>hi</sup> | 101.14±0.46 <sup>b</sup>   | 181.46±9.02 <sup>iklmno</sup>    | 16.02±0.66 <sup>pq</sup>     | 0.27±0.01 <sup>op</sup>     | 12.71±0.45 <sup>op</sup>     |
| JG2016-1614   | 58.64±2.43 <sup>ab</sup>    | 1.58±0.03 <sup>g</sup>  | 142.61±2.93 <sup>i</sup>   | 127.6±8.97 <sup>a</sup>          | 11.29±0.75 <sup>abc</sup>    | 0.19±0.01 <sup>abc</sup>    | 10.08±1.76 <sup>abc</sup>    |
| JG2016-36     | 57.03±1.03 <sup>a</sup>     | 1.46±0.01 <sup>e</sup>  | 173.31±4.4 <sup>o</sup>    | 128.13±5.13 <sup>a</sup>         | 11.18±0.24 <sup>abc</sup>    | 0.19±0.01 <sup>abc</sup>    | 8.71±0.6 <sup>abc</sup>      |
| JG2016-44     | 69.42±2.26 <sup>ijkl</sup>  | 1.51±0.03 <sup>f</sup>  | 130.3±1.22 <sup>ef</sup>   | 193.38±5.14 <sup>no</sup>        | 18.31±1.16 <sup>r</sup>      | 0.31±0.02 <sup>q</sup>      | 15.4±0.93 <sup>q</sup>       |
| JG2016-45     | 62.91±1.62 <sup>cdef</sup>  | 1.76±0.01 <sup>mn</sup> | 155.47±2 <sup>kl</sup>     | 127.74±5.28 <sup>a</sup>         | 11.33±0.32 <sup>abc</sup>    | 0.19±0.01 <sup>abc</sup>    | 9.75±0.37 <sup>abc</sup>     |
| JG2016-634958 | 66.85±4.46 <sup>ghij</sup>  | 1.68±0.01 <sup>jk</sup> | 156.61±2.55 <sup>klm</sup> | 171.36±20.6 <sup>ijkl</sup>      | 14.87±1.64 <sup>klmnop</sup> | 0.25±0.03 <sup>ijklmn</sup> | 11.92±1.55 <sup>ijklmn</sup> |
| JG2016-74315  | 64.84±1.95 <sup>efgh</sup>  | 1.91±0.02 <sup>p</sup>  | 163.97±2.54 <sup>n</sup>   | 145.52±5.02 <sup>bcde</sup>      | 11.91±0.72 <sup>bcdefg</sup> | 0.2±0.01 <sup>bcde</sup>    | 9.81±0.24 <sup>bcde</sup>    |
| JG2016-921814 | 65.58±1.65 <sup>ghij</sup>  | 1.65±0.03 <sup>ij</sup> | 172.5±4.01 <sup>o</sup>    | 151.62±4.95 <sup>defgh</sup>     | 13.72±0.48 <sup>hijk</sup>   | 0.23±0.01 <sup>ghij</sup>   | 12.73±0.88 <sup>ghij</sup>   |
| JG2016-9605   | 57.63±1.19 <sup>a</sup>     | 1.09±0.02 <sup>a</sup>  | 186.16±2.69 <sup>q</sup>   | 136.04±4.22 <sup>abc</sup>       | 11.01±0.29 <sup>ab</sup>     | 0.18±0.01 <sup>abc</sup>    | 9.21±1.16 <sup>ab</sup>      |
| JG2016-9651   | 62.96±0.89 <sup>cdef</sup>  | 1.77±0.01 <sup>no</sup> | 163.42±2.52 <sup>n</sup>   | 147.73±5.88 <sup>cdef</sup>      | 12.68±0.13 <sup>defgh</sup>  | 0.22±0.01 <sup>defg</sup>   | 10.99±0.84 <sup>defg</sup>   |
| JG2017-48     | 62.36±1.42 <sup>cdef</sup>  | 2.13±0.01 <sup>tu</sup> | 159.67±2.76 <sup>lmn</sup> | 128.18±13.97 <sup>a</sup>        | 11.48±0.43 <sup>abcd</sup>   | 0.19±0.01 <sup>abc</sup>    | 9.67±0.84 <sup>abc</sup>     |
| JG2018-51     | 67.38±1.45 <sup>hij</sup>   | 2.14±0.01 <sup>u</sup>  | 179.16±0.33 <sup>p</sup>   | 151.55±11.53 <sup>bcdeghi</sup>  | 13.13±0.58 <sup>ghij</sup>   | 0.22±0.01 <sup>efgh</sup>   | 11.85±2.15 <sup>efgh</sup>   |
| JG2021-1424   | 62.22±1.44 <sup>cde</sup>   | 1.9±0.01 <sup>p</sup>   | 191.23±1.67 <sup>r</sup>   | 151.54±4.16 <sup>defgh</sup>     | 12.91±0.16 <sup>fgh</sup>    | 0.22±0.01 <sup>efgh</sup>   | 10.37±0.72 <sup>efgh</sup>   |
| JG2021-1617   | 59.80±1.81 <sup>abc</sup>   | 1.8±0.03 <sup>o</sup>   | 174.04±1.49 <sup>o</sup>   | 139.19±6.84 <sup>abcde</sup>     | 11.61±0.66 <sup>bcde</sup>   | 0.2±0.01 <sup>bcd</sup>     | 9.26±0.67 <sup>bcd</sup>     |
| JG2021-6301   | 61.44±2.3 <sup>bcd</sup>    | 1.75±0.03 <sup>mn</sup> | 135.81±3.19 <sup>gh</sup>  | 149.71±16 <sup>cdefg</sup>       | 12.77±0.72 <sup>efgh</sup>   | 0.22±0.01 <sup>defg</sup>   | 11.04±1.52 <sup>defg</sup>   |
| JG2022-74     | 62.04±0.84 <sup>cde</sup>   | 1.44±0.02 <sup>e</sup>  | 132.16±2.49 <sup>fg</sup>  | 132.29±6.49 <sup>ab</sup>        | 11.47±0.28 <sup>abcd</sup>   | 0.19±0.01 <sup>abc</sup>    | 9.58±1.04 <sup>abc</sup>     |
| JG2022-75     | 58.72±0.76 <sup>ab</sup>    | 1.24±0.01 <sup>c</sup>  | 172.62±3.08 <sup>o</sup>   | 123.78±8.5 <sup>a</sup>          | 10.31±0.28 <sup>a</sup>      | 0.17±0.01 <sup>a</sup>      | 8.62±1.67 <sup>a</sup>       |

|             |                             |                         |                           |                               |                             |                            |                             |
|-------------|-----------------------------|-------------------------|---------------------------|-------------------------------|-----------------------------|----------------------------|-----------------------------|
| JG226       | 70.93±2.73 <sup>klmn</sup>  | 1.11±0.02 <sup>ab</sup> | 127.25±1.23 <sup>e</sup>  | 182.82±8.98 <sup>klmno</sup>  | 15.88±0.93 <sup>opq</sup>   | 0.27±0.02 <sup>mnop</sup>  | 13.57±0.83 <sup>mnop</sup>  |
| JG24        | 77±0.99 <sup>rs</sup>       | 1.71±0.05 <sup>kl</sup> | 187.53±4.46 <sup>qr</sup> | 189.68±4.93 <sup>mno</sup>    | 16.51±0.68 <sup>q</sup>     | 0.28±0.01 <sup>p</sup>     | 13.76±0.47 <sup>p</sup>     |
| JG28        | 68.50±0.89 <sup>ijk</sup>   | 1.71±0.02 <sup>l</sup>  | 180.77±3.55 <sup>p</sup>  | 162.81±12.27 <sup>fghi</sup>  | 14.52±0.39 <sup>klmn</sup>  | 0.24±0.01 <sup>ijklm</sup> | 12.1±0.79 <sup>ijklm</sup>  |
| JG32        | 71.41±1.1 <sup>lmnop</sup>  | 1.66±0.02 <sup>ij</sup> | 172.82±2.49 <sup>o</sup>  | 168.88±3.34 <sup>ijk</sup>    | 14.7±0.32 <sup>klmno</sup>  | 0.25±0.01 <sup>ijklm</sup> | 11.98±0.21 <sup>ijklm</sup> |
| JG33        | 67.55±2.42 <sup>hij</sup>   | 1.75±0.02 <sup>mn</sup> | 190.43±2.26 <sup>qr</sup> | 152.62±9.49 <sup>efgh</sup>   | 13.07±0.81 <sup>ghij</sup>  | 0.22±0.02 <sup>fghi</sup>  | 11.9±0.47 <sup>fghi</sup>   |
| JG36        | 67.16±0.58 <sup>hij</sup>   | 1.58±0.03 <sup>g</sup>  | 107.51±1.56 <sup>c</sup>  | 183.94±3.43 <sup>klmno</sup>  | 14.48±0.27 <sup>klmn</sup>  | 0.26±0.03 <sup>klmno</sup> | 12.58±0.94 <sup>klmno</sup> |
| JG42        | 71.31±0.87 <sup>klmno</sup> | 1.4±0.01 <sup>d</sup>   | 132.01±2.6 <sup>fg</sup>  | 164.09±4.84 <sup>ghi</sup>    | 14.15±0.41 <sup>ijkl</sup>  | 0.24±0.01 <sup>hijkl</sup> | 12.68±0.9 <sup>hijkl</sup>  |
| JG6         | 69.72±1.51 <sup>ijklm</sup> | 1.08±0.02 <sup>a</sup>  | 106.18±2.3 <sup>c</sup>   | 166.63±3.2 <sup>hij</sup>     | 14.28±0.5 <sup>ijklm</sup>  | 0.24±0.01 <sup>ijklm</sup> | 11.76±0.93 <sup>ijklm</sup> |
| JG63        | 77.66±2.51 <sup>s</sup>     | 2.08±0.01 <sup>s</sup>  | 90.68±1.82 <sup>a</sup>   | 178.13±5.08 <sup>ijklmn</sup> | 16.39±1.12 <sup>q</sup>     | 0.28±0.02 <sup>p</sup>     | 14.61±2.49 <sup>p</sup>     |
| JG74        | 69.09±2.23 <sup>jkl</sup>   | 1.09±0.01 <sup>a</sup>  | 141.98±1.81 <sup>i</sup>  | 176.48±12.38 <sup>ijklm</sup> | 15.46±0.75 <sup>mnopq</sup> | 0.26±0.01 <sup>lmnop</sup> | 12.59±0.55 <sup>lmnop</sup> |
| PG205       | 77.60±0.84 <sup>s</sup>     | 1.74±0.02 <sup>lm</sup> | 146.01±1.54 <sup>i</sup>  | 195.9±6.77 <sup>o</sup>       | 17.92±0.39 <sup>r</sup>     | 0.3±0.01 <sup>q</sup>      | 13.3±0.32 <sup>q</sup>      |
| <b>Mean</b> | <b>67.78±6.03</b>           | <b>1.67±0.31</b>        | <b>153.99±26.89</b>       | <b>160.44±21.67</b>           | <b>13.93±2.06</b>           | <b>0.24±0.04</b>           | <b>11.92±2.01</b>           |

Data pooled for two successive seasons and presented as mean of triplicate ± standard deviation. Means with the same letter are not significantly different at 5% level. Where RWC, CTD, SLA, Ci, Pn, gs, Tr indicates for relative water content, canopy temperature depression, specific leaf area, internal CO<sub>2</sub> concentration, photosynthetic rate, stomatal conductance, and transpiration rate, respectively.

Supplementary Material Table S4. Pooled biochemical responses of various chickpea genotypes under normal irrigated condition.

| Genotypes     | Chla                      | Chlb                     | Protein                 | H <sub>2</sub> O <sub>2</sub> | EL (%)                        | MDA                     | Sugar                   | Proline                  |
|---------------|---------------------------|--------------------------|-------------------------|-------------------------------|-------------------------------|-------------------------|-------------------------|--------------------------|
| ICC4958       | 0.47±0.01 <sup>defg</sup> | 0.42±0.03 <sup>q</sup>   | 0.54±0.04 <sup>c</sup>  | 1.51±0.1 <sup>b</sup>         | 29.65±1.36 <sup>abcd</sup>    | 5.55±0.14 <sup>p</sup>  | 1.43±0.11 <sup>u</sup>  | 28.55±1.2 <sup>p</sup>   |
| ICCV15102     | 0.47±0.03 <sup>efgh</sup> | 0.37±0.03 <sup>ij</sup>  | 0.57±0.04 <sup>g</sup>  | 1.62±0.08 <sup>efg</sup>      | 34.19±2.19 <sup>klm</sup>     | 7.47±0.1 <sup>xy</sup>  | 1.27±0.1 <sup>mn</sup>  | 32.82±1.13 <sup>u</sup>  |
| ICCV15115     | 0.47±0.02 <sup>defg</sup> | 0.4±0.02 <sup>o</sup>    | 0.57±0.03 <sup>gh</sup> | 1.68±0.07 <sup>jk</sup>       | 32.18±1.46 <sup>hij</sup>     | 2.08±0.1 <sup>c</sup>   | 1.23±0.1 <sup>jkl</sup> | 20.93±1.27 <sup>i</sup>  |
| ICCV15118     | 0.47±0.03 <sup>def</sup>  | 0.37±0.02 <sup>ijk</sup> | 0.57±0.03 <sup>gh</sup> | 1.63±0.06 <sup>fghi</sup>     | 33.08±1.37 <sup>ijk</sup>     | 4.85±0.12 <sup>mn</sup> | 1.27±0.1 <sup>n</sup>   | 20.99±1.12 <sup>i</sup>  |
| ICCV181664    | 0.46±0.02 <sup>cd</sup>   | 0.36±0.04 <sup>i</sup>   | 0.59±0.06 <sup>k</sup>  | 1.76±0.08 <sup>m</sup>        | 34.47±1.56 <sup>klm</sup>     | 7.38±0.13 <sup>x</sup>  | 1.24±0.1 <sup>kl</sup>  | 28.94±1.23 <sup>pq</sup> |
| ICCV19616     | 0.48±0.02 <sup>gh</sup>   | 0.34±0.02 <sup>fgh</sup> | 0.57±0.03 <sup>gh</sup> | 1.66±0.07 <sup>ij</sup>       | 33.63±2 <sup>klm</sup>        | 7.02±0.08 <sup>w</sup>  | 1.15±0.09 <sup>de</sup> | 33.84±1.01 <sup>v</sup>  |
| JAKI9218      | 0.48±0.02 <sup>gh</sup>   | 0.40±0.03 <sup>op</sup>  | 0.52±0.04 <sup>a</sup>  | 1.41±0.1 <sup>a</sup>         | 30.30±1.12 <sup>abcdefg</sup> | 6.94±0.1 <sup>w</sup>   | 1.40±0.11 <sup>t</sup>  | 29.88±1.01 <sup>r</sup>  |
| JG11          | 0.48±0.03 <sup>gh</sup>   | 0.39±0.03 <sup>no</sup>  | 0.55±0.04 <sup>de</sup> | 1.55±0.09 <sup>c</sup>        | 29.81±1.26 <sup>abcde</sup>   | 6.76±0.32 <sup>v</sup>  | 1.41±0.1 <sup>t</sup>   | 27.91±1.12 <sup>o</sup>  |
| JG14          | 0.47±0.03 <sup>efgh</sup> | 0.26±0.03 <sup>c</sup>   | 0.58±0.04 <sup>j</sup>  | 1.76±0.08 <sup>m</sup>        | 31.77±1.99 <sup>ghi</sup>     | 4.27±0.17 <sup>i</sup>  | 1.22±0.1 <sup>ijk</sup> | 21.96±1.55 <sup>i</sup>  |
| JG16          | 0.50±0.03 <sup>i</sup>    | 0.35±0.03 <sup>gh</sup>  | 0.54±0.03 <sup>c</sup>  | 1.51±0.07 <sup>b</sup>        | 30.35±1.53 <sup>abcdefg</sup> | 7.88±0.35 <sup>z</sup>  | 1.19±0.09 <sup>g</sup>  | 32.17±1.34 <sup>t</sup>  |
| JG17          | 0.50±0.03 <sup>i</sup>    | 0.23±0.02 <sup>b</sup>   | 0.56±0.03 <sup>f</sup>  | 1.62±0.12 <sup>fgh</sup>      | 31.72±1.37 <sup>ghi</sup>     | 4.50±0.08 <sup>k</sup>  | 1.29±0.12 <sup>o</sup>  | 19.47±1.23 <sup>de</sup> |
| JG2003-14-16  | 0.44±0.03 <sup>b</sup>    | 0.34±0.03 <sup>efg</sup> | 0.58±0.04 <sup>hi</sup> | 1.71±0.08 <sup>kl</sup>       | 32.07±2.15 <sup>hij</sup>     | 3.71±0.1 <sup>h</sup>   | 1.18±0.1 <sup>fg</sup>  | 28.82±1.3 <sup>p</sup>   |
| JG2016-1411   | 0.48±0.03 <sup>fgh</sup>  | 0.34±0.03 <sup>gh</sup>  | 0.57±0.05 <sup>gh</sup> | 1.69±0.06 <sup>kl</sup>       | 32.12±1.84 <sup>hij</sup>     | 1.32±0.14 <sup>a</sup>  | 1.28±0.11 <sup>no</sup> | 17.18±1.12 <sup>a</sup>  |
| JG2016-1614   | 0.46±0.03 <sup>cde</sup>  | 0.42±0.02 <sup>q</sup>   | 0.57±0.03 <sup>gh</sup> | 1.71±0.08 <sup>kl</sup>       | 30.79±1.17 <sup>cdefgh</sup>  | 3.62±0.11 <sup>h</sup>  | 1.21±0.09 <sup>hi</sup> | 19.09±1.18 <sup>cd</sup> |
| JG2016-36     | 0.47±0.03 <sup>def</sup>  | 0.40±0.02 <sup>o</sup>   | 0.61±0.04 <sup>m</sup>  | 1.88±0.08 <sup>o</sup>        | 35.01±2.31 <sup>m</sup>       | 4.23±0.08 <sup>i</sup>  | 1.26±0.09 <sup>mn</sup> | 17.67±1.01 <sup>b</sup>  |
| JG2016-44     | 0.47±0.03 <sup>def</sup>  | 0.38±0.03 <sup>klm</sup> | 0.59±0.03 <sup>k</sup>  | 1.75±0.1 <sup>m</sup>         | 33.20±1.74 <sup>ijkl</sup>    | 7.60±0.08 <sup>y</sup>  | 1.22±0.09 <sup>ij</sup> | 34.22±1.01 <sup>v</sup>  |
| JG2016-45     | 0.48±0.03 <sup>h</sup>    | 0.37±0.03 <sup>jkl</sup> | 0.57±0.03 <sup>gh</sup> | 1.64±0.07 <sup>fghi</sup>     | 32.08±2.57 <sup>hij</sup>     | 4.96±0.22 <sup>n</sup>  | 1.24±0.1 <sup>jkl</sup> | 27.41±1.23 <sup>n</sup>  |
| JG2016-634958 | 0.48±0.03 <sup>h</sup>    | 0.33±0.04 <sup>e</sup>   | 0.59±0.03 <sup>k</sup>  | 1.75±0.07 <sup>m</sup>        | 29.13±1.86 <sup>ab</sup>      | 6.11±0.07 <sup>t</sup>  | 1.47±0.11 <sup>v</sup>  | 22.25±1.01 <sup>j</sup>  |
| JG2016-74315  | 0.48±0.02 <sup>gh</sup>   | 0.40±0.02 <sup>o</sup>   | 0.57±0.04 <sup>gh</sup> | 1.65±0.08 <sup>hij</sup>      | 30.77±2.24 <sup>cdefgh</sup>  | 3.41±0.17 <sup>g</sup>  | 1.17±0.1 <sup>ef</sup>  | 23.97±1.01 <sup>k</sup>  |
| JG2016-921814 | 0.46±0.02 <sup>cd</sup>   | 0.42±0.03 <sup>q</sup>   | 0.57±0.03 <sup>gh</sup> | 1.62±0.12 <sup>fgh</sup>      | 28.87±1.55 <sup>a</sup>       | 4.90±0.08 <sup>n</sup>  | 1.43±0.1 <sup>u</sup>   | 27.53±1.12 <sup>o</sup>  |
| JG2016-9605   | 0.49±0.03 <sup>i</sup>    | 0.39±0.04 <sup>mn</sup>  | 0.56±0.03 <sup>f</sup>  | 1.63±0.08 <sup>fghi</sup>     | 30.45±2.16 <sup>abcdefg</sup> | 4.60±0.28 <sup>kl</sup> | 1.04±0.09 <sup>a</sup>  | 41.81±1.95 <sup>w</sup>  |
| JG2016-9651   | 0.47±0.02 <sup>defg</sup> | 0.34±0.02 <sup>fgh</sup> | 0.64±0.03 <sup>o</sup>  | 1.97±0.08 <sup>q</sup>        | 30.37±1.7 <sup>abcdefg</sup>  | 4.05±0.09 <sup>i</sup>  | 1.32±0.1 <sup>p</sup>   | 19.72±1.01 <sup>ef</sup> |
| JG2017-48     | 0.47±0.03 <sup>efgh</sup> | 0.37±0.03 <sup>ij</sup>  | 0.60±0.03 <sup>l</sup>  | 1.79±0.1 <sup>n</sup>         | 33.44±1.17 <sup>klm</sup>     | 5.84±0.09 <sup>qr</sup> | 1.46±0.1 <sup>v</sup>   | 28.87±1.12 <sup>pq</sup> |
| JG2018-51     | 0.48±0.03 <sup>fgh</sup>  | 0.35±0.03 <sup>gh</sup>  | 0.60±0.03 <sup>l</sup>  | 1.87±0.07 <sup>o</sup>        | 33.51±1.56 <sup>ijklm</sup>   | 5.24±0.08 <sup>o</sup>  | 1.35±0.1 <sup>rs</sup>  | 22.25±1.01 <sup>j</sup>  |
| JG2021-1424   | 0.46±0.02 <sup>cd</sup>   | 0.41±0.03 <sup>pq</sup>  | 0.65±0.03 <sup>p</sup>  | 2.03±0.09 <sup>r</sup>        | 30.03±1.42 <sup>abcdef</sup>  | 2.97±0.12 <sup>f</sup>  | 1.19±0.1 <sup>gh</sup>  | 17.61±1.3 <sup>ab</sup>  |
| JG2021-1617   | 0.46±0.02 <sup>cd</sup>   | 0.37±0.03 <sup>ij</sup>  | 0.63±0.03 <sup>n</sup>  | 1.98±0.09 <sup>q</sup>        | 28.94±1.55 <sup>a</sup>       | 7.37±0.07 <sup>x</sup>  | 1.23±0.09 <sup>jk</sup> | 31.22±1.01 <sup>s</sup>  |
| JG2021-6301   | 0.47±0.02 <sup>defg</sup> | 0.40±0.04 <sup>op</sup>  | 0.69±0.04 <sup>q</sup>  | 2.22±0.08 <sup>s</sup>        | 29.47±1.48 <sup>abc</sup>     | 2.6±0.14 <sup>e</sup>   | 1.47±0.12 <sup>v</sup>  | 19.96±1.27 <sup>fg</sup> |
| JG2022-74     | 0.46±0.03 <sup>cde</sup>  | 0.40±0.03 <sup>op</sup>  | 0.56±0.03 <sup>f</sup>  | 1.59±0.08 <sup>de</sup>       | 30.27±2.6 <sup>abcdefg</sup>  | 2.87±0.11 <sup>f</sup>  | 1.14±0.09 <sup>cd</sup> | 18.7±1.27 <sup>c</sup>   |
| JG2022-75     | 0.47±0.03 <sup>efgh</sup> | 0.35±0.03 <sup>h</sup>   | 0.63±0.03 <sup>n</sup>  | 1.94±0.07 <sup>p</sup>        | 33.94±3.02 <sup>klm</sup>     | 6.18±0.13 <sup>t</sup>  | 1.09±0.09 <sup>b</sup>  | 25.36±1.3 <sup>m</sup>   |

|             |                           |                          |                         |                          |                               |                         |                         |                          |
|-------------|---------------------------|--------------------------|-------------------------|--------------------------|-------------------------------|-------------------------|-------------------------|--------------------------|
| JG226       | 0.40±0.05 <sup>a</sup>    | 0.40±0.02 <sup>o</sup>   | 0.58±0.04 <sup>j</sup>  | 1.71±0.06 <sup>kl</sup>  | 34.58±1.47 <sup>klm</sup>     | 2.26±0.08 <sup>d</sup>  | 1.25±0.09 <sup>lm</sup> | 20.29±1.01 <sup>gh</sup> |
| JG24        | 0.48±0.03 <sup>h</sup>    | 0.28±0.03 <sup>d</sup>   | 0.56±0.04 <sup>ef</sup> | 1.56±0.08 <sup>cd</sup>  | 31.12±1.65 <sup>defgh</sup>   | 4.53±0.22 <sup>k</sup>  | 1.16±0.09 <sup>e</sup>  | 19.21±1.68 <sup>d</sup>  |
| JG28        | 0.50±0.02 <sup>i</sup>    | 0.21±0.03 <sup>a</sup>   | 0.57±0.04 <sup>g</sup>  | 1.61±0.09 <sup>ef</sup>  | 31.16±1.66 <sup>defgh</sup>   | 4.22±0.11 <sup>j</sup>  | 1.13±0.1 <sup>c</sup>   | 21.95±1.23 <sup>j</sup>  |
| JG32        | 0.48±0.03 <sup>h</sup>    | 0.33±0.02 <sup>ef</sup>  | 0.57±0.03 <sup>gh</sup> | 1.65±0.08 <sup>hij</sup> | 31.02±1.72 <sup>cdefgh</sup>  | 5.21±0.12 <sup>o</sup>  | 1.33±0.1 <sup>pq</sup>  | 24.74±1.23 <sup>l</sup>  |
| JG33        | 0.48±0.03 <sup>fgh</sup>  | 0.34±0.03 <sup>efg</sup> | 0.57±0.04 <sup>gh</sup> | 1.71±0.08 <sup>kl</sup>  | 31.34±1.33 <sup>efgh</sup>    | 1.73±0.09 <sup>b</sup>  | 1.36±0.1 <sup>s</sup>   | 20.61±1.12 <sup>hi</sup> |
| JG36        | 0.45±0.03 <sup>c</sup>    | 0.38±0.03 <sup>lmn</sup> | 0.58±0.03 <sup>ij</sup> | 1.71±0.07 <sup>kl</sup>  | 34.09±1.52 <sup>klm</sup>     | 6.07±0.16 <sup>st</sup> | 1.13±0.1 <sup>c</sup>   | 32.55±1.49 <sup>tu</sup> |
| JG42        | 0.48±0.02 <sup>gh</sup>   | 0.41±0.03 <sup>pq</sup>  | 0.58±0.04 <sup>j</sup>  | 1.72±0.09 <sup>l</sup>   | 34.71±1.73 <sup>lm</sup>      | 6.46±0.1 <sup>u</sup>   | 1.15±0.09 <sup>de</sup> | 32.76±1.24 <sup>u</sup>  |
| JG6         | 0.47±0.03 <sup>efgh</sup> | 0.35±0.03 <sup>gh</sup>  | 0.54±0.03 <sup>c</sup>  | 1.49±0.07 <sup>b</sup>   | 31.65±2.21 <sup>fghi</sup>    | 5.75±0.09 <sup>q</sup>  | 1.26±0.12 <sup>mn</sup> | 29.31±1.01 <sup>q</sup>  |
| JG63        | 0.47±0.03 <sup>defg</sup> | 0.37±0.02 <sup>ijk</sup> | 0.53±0.04 <sup>b</sup>  | 1.48±0.06 <sup>b</sup>   | 30.64±1.39 <sup>bcdefgh</sup> | 4.50±0.24 <sup>k</sup>  | 1.44±0.1 <sup>u</sup>   | 27.22±1.3 <sup>n</sup>   |
| JG74        | 0.46±0.03 <sup>cde</sup>  | 0.38±0.02 <sup>klm</sup> | 0.55±0.03 <sup>d</sup>  | 1.57±0.08 <sup>cd</sup>  | 30.35±1.55 <sup>abcdefg</sup> | 5.93±0.11 <sup>rs</sup> | 1.34±0.1 <sup>qr</sup>  | 29.34±1.2 <sup>q</sup>   |
| PG205       | 0.46±0.02 <sup>cd</sup>   | 0.35±0.03 <sup>gh</sup>  | 0.57±0.03 <sup>gh</sup> | 1.65±0.08 <sup>ghi</sup> | 34.67±1.63 <sup>klm</sup>     | 4.72±0.08 <sup>lm</sup> | 1.09±0.09 <sup>b</sup>  | 18±1.01 <sup>b</sup>     |
| <b>Mean</b> | <b>0.47±0.04</b>          | <b>0.36±0.07</b>         | <b>0.58±0.06</b>        | <b>1.7±0.22</b>          | <b>31.77±2.94</b>             | <b>4.94±1.77</b>        | <b>1.26±0.2</b>         | <b>25.43±6.89</b>        |

Data pooled for two successive seasons and presented as mean of triplicate ± standard deviation. Means with the same letter are not significantly different at 5% level. Where, Chla, Chlb, H<sub>2</sub>O<sub>2</sub>, EL and MDA indicate chlorophyll a, chlorophyll b, hydrogen peroxide, electrolyte leakage and malondialdehyde, respectively.

Supplementary Material Table S5. Biochemical responses of various chickpea genotypes under terminal drought stressed condition.

| Genotypes     | Chla                    | Chlb                     | Protein                  | H <sub>2</sub> O <sub>2</sub> | EL (%)                      | MDA                     | Sugar                      | Proline                      |
|---------------|-------------------------|--------------------------|--------------------------|-------------------------------|-----------------------------|-------------------------|----------------------------|------------------------------|
| ICC4958       | 0.39±0.02 <sup>i</sup>  | 0.31±0.02 <sup>r</sup>   | 0.38±0.05 <sup>ijk</sup> | 3.6±0.08 <sup>ij</sup>        | 35±1.48 <sup>a</sup>        | 6.63±0.37 <sup>hi</sup> | 2.07±0.12 <sup>x</sup>     | 86.17±1.66 <sup>q</sup>      |
| ICCV15102     | 0.38±0.03 <sup>hi</sup> | 0.24±0.01 <sup>kl</sup>  | 0.36±0.07 <sup>cd</sup>  | 3.51±0.09 <sup>cd</sup>       | 34.52±3.66 <sup>a</sup>     | 9.95±0.28 <sup>o</sup>  | 1.84±0.11 <sup>no</sup>    | 69.51±1.3 <sup>n</sup>       |
| ICCV15115     | 0.36±0.03 <sup>de</sup> | 0.26±0.03 <sup>no</sup>  | 0.38±0.05 <sup>ijk</sup> | 3.53±0.11 <sup>defg</sup>     | 40.47±3.3 <sup>cdef</sup>   | 2.89±0.19 <sup>b</sup>  | 1.83±0.15 <sup>klmno</sup> | 61.64±1.9 <sup>hijk</sup>    |
| ICCV15118     | 0.37±0.01 <sup>fg</sup> | 0.25±0.03 <sup>mno</sup> | 0.39±0.05 <sup>lmn</sup> | 3.8±0.08 <sup>pq</sup>        | 40.04±1.94 <sup>bcdef</sup> | 6.72±0.11 <sup>hi</sup> | 1.81±0.11 <sup>ijklm</sup> | 60.58±1.13 <sup>fgh</sup>    |
| ICCV181664    | 0.38±0.03 <sup>hi</sup> | 0.24±0.02 <sup>kl</sup>  | 0.40±0.04 <sup>n</sup>   | 3.6±0.07 <sup>j</sup>         | 41.60±2.39 <sup>defg</sup>  | 9.47±0.13 <sup>n</sup>  | 1.84±0.11 <sup>mno</sup>   | 61.64±1.35 <sup>hijk</sup>   |
| ICCV19616     | 0.36±0.05 <sup>de</sup> | 0.22±0.03 <sup>ij</sup>  | 0.40±0.05 <sup>mn</sup>  | 3.54±0.09 <sup>defg</sup>     | 41.26±1.18 <sup>cdefg</sup> | 10.25±0.25 <sup>o</sup> | 1.74±0.11 <sup>def</sup>   | 69.1±1.37 <sup>mn</sup>      |
| JAKI9218      | 0.39±0.02 <sup>i</sup>  | 0.31±0.04 <sup>r</sup>   | 0.36±0.05 <sup>c</sup>   | 3.41±0.07 <sup>a</sup>        | 36.45±1.28 <sup>ab</sup>    | 8.37±0.27 <sup>kl</sup> | 2.05±0.11 <sup>wx</sup>    | 86.85±2.18 <sup>q</sup>      |
| JG11          | 0.39±0.02 <sup>i</sup>  | 0.29±0.02 <sup>q</sup>   | 0.39±0.04 <sup>klm</sup> | 3.46±0.08 <sup>b</sup>        | 34.49±1.49 <sup>a</sup>     | 9.42±0.33 <sup>n</sup>  | 2.06±0.11 <sup>wx</sup>    | 89.18±1.64 <sup>r</sup>      |
| JG14          | 0.37±0.02 <sup>fg</sup> | 0.16±0.02 <sup>d</sup>   | 0.38±0.05 <sup>ghi</sup> | 3.72±0.08 <sup>mn</sup>       | 42.96±1.37 <sup>efg</sup>   | 5.84±0.33 <sup>f</sup>  | 1.8±0.13 <sup>hijk</sup>   | 58.9±1.44 <sup>de</sup>      |
| JG16          | 0.41±0.03 <sup>k</sup>  | 0.24±0.05 <sup>kl</sup>  | 0.37±0.04 <sup>efg</sup> | 3.57±0.08 <sup>ghij</sup>     | 39.04±1.33 <sup>bcde</sup>  | 10.11±0.2 <sup>o</sup>  | 1.83±0.12 <sup>lmno</sup>  | 89.09±1.56 <sup>r</sup>      |
| JG17          | 0.39±0.02 <sup>i</sup>  | 0.13±0.03 <sup>b</sup>   | 0.38±0.08 <sup>hij</sup> | 3.74±0.11 <sup>no</sup>       | 40.78±1.41 <sup>cdef</sup>  | 6.50±0.16 <sup>hi</sup> | 1.85±0.13 <sup>no</sup>    | 56.51±1.13 <sup>ab</sup>     |
| JG2003-14-16  | 0.33±0.02 <sup>b</sup>  | 0.22±0.02 <sup>i</sup>   | 0.36±0.04 <sup>cd</sup>  | 3.41±0.08 <sup>a</sup>        | 39.89±2.39 <sup>bcdef</sup> | 5.24±0.17 <sup>e</sup>  | 1.76±0.12 <sup>efg</sup>   | 62.32±1.71 <sup>kl</sup>     |
| JG2016-1411   | 0.38±0.04 <sup>i</sup>  | 0.23±0.03 <sup>k</sup>   | 0.37±0.05 <sup>fgh</sup> | 3.52±0.07 <sup>def</sup>      | 42.32±1.35 <sup>efg</sup>   | 2.05±0.16 <sup>a</sup>  | 1.83±0.12 <sup>klmn</sup>  | 56.51±1.35 <sup>ab</sup>     |
| JG2016-1614   | 0.38±0.03 <sup>hi</sup> | 0.25±0.02 <sup>lmn</sup> | 0.39±0.04 <sup>klm</sup> | 3.51±0.08 <sup>cde</sup>      | 39.66±1.91 <sup>bcdef</sup> | 6±0.17 <sup>f</sup>     | 1.78±0.1 <sup>ghi</sup>    | 58.49±1.64 <sup>d</sup>      |
| JG2016-36     | 0.38±0.02 <sup>i</sup>  | 0.25±0.03 <sup>lm</sup>  | 0.42±0.04 <sup>p</sup>   | 3.77±0.1 <sup>op</sup>        | 40.54±1.9 <sup>cdef</sup>   | 6.81±21.48 <sup>i</sup> | 1.84±0.12 <sup>no</sup>    | 57.19±1.77 <sup>bc</sup>     |
| JG2016-44     | 0.38±0.02 <sup>i</sup>  | 0.26±0.02 <sup>op</sup>  | 0.42±0.04 <sup>p</sup>   | 3.84±0.09 <sup>rs</sup>       | 42.13±1.84 <sup>efg</sup>   | 10.22±0.15 <sup>o</sup> | 1.8±0.11 <sup>hijkl</sup>  | 67.94±1.34 <sup>m</sup>      |
| JG2016-45     | 0.38±0.02 <sup>i</sup>  | 0.22±0.03 <sup>hi</sup>  | 0.37±0.05 <sup>def</sup> | 3.66±0.08 <sup>k</sup>        | 41.54±1.48 <sup>defg</sup>  | 7.40±0.12 <sup>j</sup>  | 1.83±0.11 <sup>lmno</sup>  | 61.96±1.3 <sup>ijk</sup>     |
| JG2016-634958 | 0.37±0.02 <sup>fg</sup> | 0.21±0.02 <sup>h</sup>   | 0.40±0.05 <sup>mn</sup>  | 3.58±0.08 <sup>hij</sup>      | 45.08±1.84 <sup>g</sup>     | 9.12±0.25 <sup>n</sup>  | 2.07±0.13 <sup>wx</sup>    | 61.21±1.62 <sup>ghijk</sup>  |
| JG2016-74315  | 0.36±0.02 <sup>d</sup>  | 0.23±0.02 <sup>jk</sup>  | 0.39±0.05 <sup>jkl</sup> | 3.67±0.09 <sup>kl</sup>       | 40.97±1.75 <sup>cdef</sup>  | 5.18±0.09 <sup>e</sup>  | 1.74±0.1 <sup>def</sup>    | 62.16±1.17 <sup>jk</sup>     |
| JG2016-921814 | 0.36±0.02 <sup>d</sup>  | 0.26±0.02 <sup>op</sup>  | 0.37±0.04 <sup>efg</sup> | 3.6±0.11 <sup>j</sup>         | 43.83±1.84 <sup>fg</sup>    | 7.48±0.28 <sup>j</sup>  | 1.99±0.12 <sup>u</sup>     | 62.17±1.78 <sup>jk</sup>     |
| JG2016-9605   | 0.38±0.04 <sup>hi</sup> | 0.23±0.02 <sup>jk</sup>  | 0.34±0.04 <sup>b</sup>   | 3.48±0.07 <sup>bc</sup>       | 40.92±2.02 <sup>cdef</sup>  | 8.73±0.53 <sup>m</sup>  | 1.60±0.11 <sup>a</sup>     | 71.93±1.78 <sup>o</sup>      |
| JG2016-9651   | 0.36±0.02 <sup>d</sup>  | 0.23±0.06 <sup>jk</sup>  | 0.42±0.04 <sup>p</sup>   | 3.81±0.09 <sup>qr</sup>       | 42.59±2.49 <sup>efg</sup>   | 6.38±0.64 <sup>gh</sup> | 1.89±0.11 <sup>pq</sup>    | 56.31±1.17 <sup>ab</sup>     |
| JG2017-48     | 0.37±0.02 <sup>fg</sup> | 0.25±0.02 <sup>lmn</sup> | 0.41±0.04 <sup>o</sup>   | 3.75±0.08 <sup>no</sup>       | 40.55±2.08 <sup>cdef</sup>  | 7.52±0.14 <sup>j</sup>  | 2.02±0.11 <sup>uv</sup>    | 58.9±1.41 <sup>de</sup>      |
| JG2018-51     | 0.37±0.03 <sup>gh</sup> | 0.24±0.02 <sup>kl</sup>  | 0.42±0.04 <sup>p</sup>   | 3.74±0.08 <sup>no</sup>       | 40.38±2.16 <sup>bcdef</sup> | 7.53±0.14 <sup>j</sup>  | 1.96±0.11 <sup>t</sup>     | 61.48±1.4 <sup>hijk</sup>    |
| JG2021-1424   | 0.37±0.02 <sup>fg</sup> | 0.26±0.02 <sup>op</sup>  | 0.44±0.04 <sup>q</sup>   | 3.77±0.08 <sup>op</sup>       | 40.69±1.51 <sup>cdef</sup>  | 4.93±0.36 <sup>e</sup>  | 1.77±0.11 <sup>fgh</sup>   | 58.27±1.32 <sup>cd</sup>     |
| JG2021-1617   | 0.37±0.02 <sup>fg</sup> | 0.24±0.02 <sup>kl</sup>  | 0.45±0.05 <sup>q</sup>   | 4.09±0.13 <sup>v</sup>        | 39.80±1.65 <sup>bcdef</sup> | 11.22±0.16 <sup>q</sup> | 1.79±0.13 <sup>hij</sup>   | 63.52±2.05 <sup>l</sup>      |
| JG2021-6301   | 0.37±0.03 <sup>ef</sup> | 0.26±0.02 <sup>op</sup>  | 0.47±0.05 <sup>r</sup>   | 3.89±0.15 <sup>t</sup>        | 41.64±1.67 <sup>defg</sup>  | 4.16±0.42 <sup>d</sup>  | 2.04±0.11 <sup>vw</sup>    | 62.56±1.47 <sup>kl</sup>     |
| JG2022-74     | 0.37±0.03 <sup>ef</sup> | 0.25±0.02 <sup>lmn</sup> | 0.40±0.04 <sup>n</sup>   | 3.7±0.08 <sup>lm</sup>        | 39.36±1.84 <sup>bcde</sup>  | 4.39±0.21 <sup>d</sup>  | 1.69±0.1 <sup>c</sup>      | 61.17±1.74 <sup>fghijk</sup> |
| JG2022-75     | 0.37±0.05 <sup>fg</sup> | 0.23±0.02 <sup>jk</sup>  | 0.44±0.04 <sup>q</sup>   | 3.81±0.09 <sup>qr</sup>       | 39.02±1.65 <sup>bcde</sup>  | 8.12±0.13 <sup>k</sup>  | 1.64±0.11 <sup>b</sup>     | 55.83±1.29 <sup>a</sup>      |

|             |                         |                         |                          |                           |                             |                         |                           |                             |
|-------------|-------------------------|-------------------------|--------------------------|---------------------------|-----------------------------|-------------------------|---------------------------|-----------------------------|
| JG226       | 0.30±0.02 <sup>a</sup>  | 0.24±0.02 <sup>kl</sup> | 0.37±0.04 <sup>efg</sup> | 3.56±0.08 <sup>fghi</sup> | 42.40±1.55 <sup>efg</sup>   | 3.58±0.18 <sup>c</sup>  | 1.82±0.11 <sup>klmn</sup> | 61.62±2.05 <sup>hijk</sup>  |
| JG24        | 0.38±0.02 <sup>i</sup>  | 0.15±0.02 <sup>c</sup>  | 0.36±0.04 <sup>cd</sup>  | 3.5±0.07 <sup>cd</sup>    | 42.25±1.47 <sup>efg</sup>   | 6.6±0.17 <sup>hi</sup>  | 1.72±0.11 <sup>d</sup>    | 62.09±1.58 <sup>jk</sup>    |
| JG28        | 0.39±0.02 <sup>j</sup>  | 0.10±0.03 <sup>a</sup>  | 0.36±0.05 <sup>cde</sup> | 3.55±0.09 <sup>efgh</sup> | 37.19±1.44 <sup>abc</sup>   | 6.59±0.18 <sup>hi</sup> | 1.72±0.1 <sup>d</sup>     | 62.5±1.98 <sup>kl</sup>     |
| JG32        | 0.37±0.03 <sup>gh</sup> | 0.18±0.02 <sup>e</sup>  | 0.36±0.04 <sup>cd</sup>  | 3.39±0.11 <sup>a</sup>    | 39.49±1.19 <sup>bcde</sup>  | 7.44±0.3 <sup>j</sup>   | 1.91±0.12 <sup>qr</sup>   | 61.86±1.54 <sup>hijk</sup>  |
| JG33        | 0.38±0.02 <sup>i</sup>  | 0.19±0.02 <sup>f</sup>  | 0.38±0.05 <sup>ghi</sup> | 3.76±0.08 <sup>no</sup>   | 41.81±1.34 <sup>efg</sup>   | 2.71±0.09 <sup>b</sup>  | 1.95±0.12 <sup>st</sup>   | 60.64±2.68 <sup>fghi</sup>  |
| JG36        | 0.37±0.04 <sup>gh</sup> | 0.22±0.02 <sup>i</sup>  | 0.39±0.04 <sup>klm</sup> | 3.86±0.13 <sup>st</sup>   | 42.03±2.86 <sup>efg</sup>   | 8.37±0.23 <sup>kl</sup> | 1.73±0.11 <sup>de</sup>   | 60.08±1.79 <sup>efg</sup>   |
| JG42        | 0.37±0.03 <sup>gh</sup> | 0.24±0.02 <sup>kl</sup> | 0.39±0.05 <sup>lmn</sup> | 3.64±0.07 <sup>k</sup>    | 41.04±1.99 <sup>cdefg</sup> | 8.55±0.17 <sup>lm</sup> | 1.75±0.11 <sup>defg</sup> | 62.08±2 <sup>jk</sup>       |
| JG6         | 0.36±0.02 <sup>d</sup>  | 0.20±0.05 <sup>g</sup>  | 0.30±0.05 <sup>a</sup>   | 3.39±0.08 <sup>a</sup>    | 42.96±1.66 <sup>efg</sup>   | 10.67±0.23 <sup>p</sup> | 1.86±0.14 <sup>op</sup>   | 59.88±1.31 <sup>ef</sup>    |
| JG63        | 0.39±0.02 <sup>j</sup>  | 0.27±0.03 <sup>p</sup>  | 0.38±0.05 <sup>ijk</sup> | 3.96±0.08 <sup>u</sup>    | 35.17±1.65 <sup>a</sup>     | 5.85±0.23 <sup>f</sup>  | 2.06±0.11 <sup>wx</sup>   | 80.25±1.98 <sup>p</sup>     |
| JG74        | 0.35±0.02 <sup>c</sup>  | 0.20±0.02 <sup>g</sup>  | 0.34±0.04 <sup>b</sup>   | 3.53±0.07 <sup>def</sup>  | 41.80±1.8 <sup>efg</sup>    | 11.81±0.33 <sup>r</sup> | 1.92±0.12 <sup>rs</sup>   | 57.84±1.69 <sup>cd</sup>    |
| PG205       | 0.38±0.02 <sup>i</sup>  | 0.24±0.02 <sup>kl</sup> | 0.39±0.04 <sup>klm</sup> | 3.77±0.08 <sup>op</sup>   | 37.51±3.81 <sup>abcd</sup>  | 6.12±0.25 <sup>fg</sup> | 1.67±0.12 <sup>c</sup>    | 60.98±2.53 <sup>fghij</sup> |
| <b>Mean</b> | <b>0.37±0.04</b>        | <b>0.23±0.06</b>        | <b>0.39±0.07</b>         | <b>3.65±0.22</b>          | <b>40.28±4.01</b>           | <b>7.17±4.22</b>        | <b>1.85±0.23</b>          | <b>64.47±10.06</b>          |

Data pooled for two successive seasons and presented as mean of triplicate ± standard deviation. Means with the same letter are not significantly different at 5% level. Where, Chla, Chlb, H<sub>2</sub>O<sub>2</sub>, EL and MDA indicate chlorophyll a, chlorophyll b, hydrogen peroxide, electrolyte leakage and malondialdehyde, respectively.

Supplementary Material Table S6. Yield and yield attributing trait responses of various chickpea genotypes under normal irrigated condition.

| Genotypes     | DTF                         | DTM                              | NOP                          | SYPP                            | BYPP                         | HI                            | SW                         |
|---------------|-----------------------------|----------------------------------|------------------------------|---------------------------------|------------------------------|-------------------------------|----------------------------|
| ICC4958       | 61.50±0.87 <sup>bcde</sup>  | 112.33±2.02 <sup>abcdef</sup>    | 54.5±1.8 <sup>bcdef</sup>    | 11.79±0.31 <sup>a</sup>         | 33.58±0.46 <sup>hijkl</sup>  | 35.15±1.42 <sup>bcde</sup>    | 29.88±0.08 <sup>s</sup>    |
| ICCV15102     | 66.49±0.02 <sup>hijk</sup>  | 117.25±1.32 <sup>hijklmn</sup>   | 62.04±0.37 <sup>hijk</sup>   | 15.26±0.21 <sup>opqr</sup>      | 33.07±1.21 <sup>ghijk</sup>  | 46.13±1.18 <sup>nop</sup>     | 25.31±0.69 <sup>q</sup>    |
| ICCV15115     | 67.10±0.53 <sup>ijkl</sup>  | 114.42±2.08 <sup>cdefghijk</sup> | 67.32±4.76 <sup>klmno</sup>  | 14.37±0.6 <sup>klmnop</sup>     | 35.03±0.55 <sup>klmno</sup>  | 41.03±2.04 <sup>ijkl</sup>    | 23.07±0.91 <sup>nop</sup>  |
| ICCV15118     | 67±2.29 <sup>ijkl</sup>     | 116.25±0.9 <sup>fghijklm</sup>   | 60.41±3.21 <sup>ghij</sup>   | 14.38±0.66 <sup>klmnop</sup>    | 33.27±1.03 <sup>ghijk</sup>  | 43.2±1.02 <sup>klmno</sup>    | 21.18±1.37 <sup>klm</sup>  |
| ICCV181664    | 70.93±1.01 <sup>n</sup>     | 118.08±0.8 <sup>jklmn</sup>      | 57.42±2.36 <sup>defgh</sup>  | 12±0.49 <sup>ab</sup>           | 31.86±1.24 <sup>efgh</sup>   | 37.82±1.86 <sup>defghi</sup>  | 21.23±0.06 <sup>klm</sup>  |
| ICCV19616     | 68.71±1.94 <sup>jklmn</sup> | 116.67±1.46 <sup>ghijklm</sup>   | 67.97±4.34 <sup>lmnop</sup>  | 12.23±0.61 <sup>abc</sup>       | 29.69±1.37 <sup>bcd</sup>    | 41.19±3.38 <sup>ijkl</sup>    | 23.48±1.34 <sup>op</sup>   |
| JAKI9218      | 63.17±1.04 <sup>efg</sup>   | 112.83±0.29 <sup>abcdefg</sup>   | 77.58±2.75 <sup>qr</sup>     | 16.1±1.53 <sup>qr</sup>         | 34.55±1 <sup>jklmn</sup>     | 46.50±3.06 <sup>op</sup>      | 28.76±1.18 <sup>s</sup>    |
| JG11          | 60±2.6 <sup>abcd</sup>      | 109.92±1.66 <sup>a</sup>         | 71±2.46 <sup>nop</sup>       | 15.44±0.1 <sup>opqr</sup>       | 36.32±1.41 <sup>nopq</sup>   | 42.52±1.89 <sup>klmn</sup>    | 25.82±0.37 <sup>q</sup>    |
| JG14          | 65.17±2.02 <sup>fghi</sup>  | 110.17±1.76 <sup>ab</sup>        | 50.75±0.5 <sup>abc</sup>     | 13.14±0.19 <sup>bcdefghij</sup> | 32.41±2.1 <sup>efghi</sup>   | 40.68±2.82 <sup>hijkl</sup>   | 20.6±0.2 <sup>jk</sup>     |
| JG16          | 65.83±1.04 <sup>ghij</sup>  | 116.5±0.87 <sup>fghijklm</sup>   | 73.32±3.1 <sup>pq</sup>      | 16.23±0.74 <sup>r</sup>         | 48.01±0.8 <sup>u</sup>       | 33.82±1.49 <sup>bc</sup>      | 27.15±0.17 <sup>r</sup>    |
| JG17          | 62.83±0.58 <sup>def</sup>   | 111.75±5.68 <sup>abcde</sup>     | 47.86±2.81 <sup>a</sup>      | 13.6±0.73 <sup>efghijkl</sup>   | 30.74±1.32 <sup>cde</sup>    | 44.14±1.19 <sup>lmno</sup>    | 20.21±0.03 <sup>ijk</sup>  |
| JG2003-14-16  | 58.50±1.73 <sup>a</sup>     | 109.92±3.19 <sup>a</sup>         | 70.8±4.37 <sup>nop</sup>     | 14.87±0.13 <sup>mnop</sup>      | 40.55±1.19 <sup>r</sup>      | 36.67±0.81 <sup>cdefg</sup>   | 23.72±0.97 <sup>p</sup>    |
| JG2016-1411   | 61.21±1.48 <sup>abcde</sup> | 113.25±1.52 <sup>abcdefgh</sup>  | 59.73±4.94 <sup>fghi</sup>   | 13.35±0.12 <sup>cdefghijk</sup> | 33.62±0.79 <sup>hijkl</sup>  | 39.74±0.96 <sup>fghijk</sup>  | 18.45±0.82 <sup>defg</sup> |
| JG2016-1614   | 67.32±2.01 <sup>ijklm</sup> | 110.75±1.64 <sup>abc</sup>       | 52.58±0.76 <sup>abcde</sup>  | 12.47±0.8 <sup>abcde</sup>      | 36.56±0.97 <sup>opq</sup>    | 34.27±3.19 <sup>bcd</sup>     | 15.65±0.83 <sup>b</sup>    |
| JG2016-36     | 67.33±0.76 <sup>ijklm</sup> | 117.75±1.52 <sup>jklmn</sup>     | 71.87±1.15 <sup>op</sup>     | 14.06±0.77 <sup>jklmn</sup>     | 32.17±1.18 <sup>efghi</sup>  | 43.68±2.35 <sup>klmno</sup>   | 17.04±0.15 <sup>c</sup>    |
| JG2016-44     | 67.38±0.82 <sup>ijklm</sup> | 114±1.39 <sup>abcdefghij</sup>   | 57.79±2.51 <sup>efgh</sup>   | 13.78±0.23 <sup>ghijklm</sup>   | 37.26±0.37 <sup>q</sup>      | 36.90±0.86 <sup>cdefgh</sup>  | 20.17±0.33 <sup>ijk</sup>  |
| JG2016-45     | 65.27±0.75 <sup>fghi</sup>  | 113.75±4.02 <sup>abcdefghi</sup> | 59.65±3.72 <sup>fghi</sup>   | 14.01±0.87 <sup>hijklmn</sup>   | 33.05±0.43 <sup>ghijk</sup>  | 42.40±3.14 <sup>klmn</sup>    | 20.02±0.41 <sup>hijk</sup> |
| JG2016-634958 | 62.43±0.93 <sup>cdef</sup>  | 119.92±1.51 <sup>mn</sup>        | 61.01±4.11 <sup>hij</sup>    | 13.35±0.1 <sup>cdefghijk</sup>  | 32.28±0.71 <sup>efghi</sup>  | 41.34±0.64 <sup>ijkl</sup>    | 23.7±0.62 <sup>p</sup>     |
| JG2016-74315  | 67.65±0.78 <sup>ijklm</sup> | 116.5±1.25 <sup>fghijklm</sup>   | 63.08±3.01 <sup>hijkl</sup>  | 12.31±0.86 <sup>abcd</sup>      | 34.63±0.24 <sup>jklmno</sup> | 35.61±2.6 <sup>bcde</sup>     | 18.97±0.9 <sup>fghi</sup>  |
| JG2016-921814 | 63.99±3.12 <sup>efgh</sup>  | 111.25±1.75 <sup>abcd</sup>      | 51.92±4.01 <sup>abcd</sup>   | 11.85±0.46 <sup>a</sup>         | 30.8±1.03 <sup>cde</sup>     | 38.44±0.23 <sup>efghij</sup>  | 22.58±0.71 <sup>nop</sup>  |
| JG2016-9605   | 64.77±0.25 <sup>fghi</sup>  | 115.17±1.44 <sup>defghijkl</sup> | 66.75±6.26 <sup>klmno</sup>  | 13.5±0.22 <sup>defghijk</sup>   | 28.84±1.61 <sup>b</sup>      | 46.84±2.29 <sup>op</sup>      | 20.93±1.2 <sup>jkl</sup>   |
| JG2016-9651   | 67.49±0.98 <sup>ijklm</sup> | 113.33±1.84 <sup>abcdefgh</sup>  | 58.03±3.34 <sup>efgh</sup>   | 14.51±0.58 <sup>klmnop</sup>    | 35.77±0.73 <sup>mnopq</sup>  | 40.48±0.91 <sup>ghijkl</sup>  | 20.01±1.41 <sup>hijk</sup> |
| JG2017-48     | 64.88±1.32 <sup>fghi</sup>  | 114.17±1.46 <sup>bcdefghij</sup> | 57.92±3.55 <sup>efgh</sup>   | 13.72±0.45 <sup>fghijklm</sup>  | 33.22±1.23 <sup>ghijk</sup>  | 41.34±2.13 <sup>ijkl</sup>    | 23.72±0.62 <sup>p</sup>    |
| JG2018-51     | 69.49±1.72 <sup>lmn</sup>   | 110.92±1.38 <sup>abc</sup>       | 49.46±0.37 <sup>abc</sup>    | 14.3±0.61 <sup>jklmno</sup>     | 39.87±1.13 <sup>r</sup>      | 35.83±0.85 <sup>bcde</sup>    | 18.66±0.24 <sup>efgh</sup> |
| JG2021-1424   | 64±1.8 <sup>efgh</sup>      | 116.33±0.72 <sup>fghijklm</sup>  | 67.64±2.11 <sup>klmnop</sup> | 12.93±0.76 <sup>abcdefghi</sup> | 35.78±0.88 <sup>mnopq</sup>  | 36.12±2.08 <sup>bcdef</sup>   | 16.99±1.1 <sup>c</sup>     |
| JG2021-1617   | 58.83±0.29 <sup>ab</sup>    | 116.25±2.63 <sup>fghijklm</sup>  | 51.42±3.75 <sup>abc</sup>    | 11.76±0.42 <sup>a</sup>         | 31.32±0.09 <sup>defg</sup>   | 37.52±1.42 <sup>cdefghi</sup> | 18.06±0.44 <sup>cdef</sup> |
| JG2021-6301   | 68.67±0.76 <sup>klm</sup>   | 119.33±1.28 <sup>lmn</sup>       | 55.08±2.08 <sup>cdefg</sup>  | 12.78±0.62 <sup>abcdefg</sup>   | 37.01±0.39 <sup>pq</sup>     | 34.47±1.45 <sup>bcd</sup>     | 14.37±0.83 <sup>a</sup>    |
| JG2022-74     | 69.65±1.24 <sup>lmn</sup>   | 117±2.61 <sup>ghijklm</sup>      | 54.06±2.03 <sup>bcdef</sup>  | 12.53±0.3 <sup>abcdef</sup>     | 31.05±0.6 <sup>def</sup>     | 40.29±0.83 <sup>ghijkl</sup>  | 20.15±0.89 <sup>ijk</sup>  |
| JG2022-75     | 70.21±1.33 <sup>mn</sup>    | 116.75±1.98 <sup>ghijklm</sup>   | 54.75±0 <sup>bcdefg</sup>    | 12.21±0.74 <sup>abc</sup>       | 35.28±1.39 <sup>lmnop</sup>  | 34.69±3.17 <sup>bcde</sup>    | 19.07±0.66 <sup>fghi</sup> |

|             |                              |                                  |                              |                                 |                             |                             |                              |
|-------------|------------------------------|----------------------------------|------------------------------|---------------------------------|-----------------------------|-----------------------------|------------------------------|
| JG226       | 63.17±1.61 <sup>efg</sup>    | 113.17±2.27 <sup>abcde fgh</sup> | 68.06±2.48 <sup>lmnop</sup>  | 15.05±0.57 <sup>nopq</sup>      | 34.94±1.19 <sup>klmno</sup> | 43.08±2.63 <sup>klmno</sup> | 21.98±1.06 <sup>lmn</sup>    |
| JG24        | 71.17±0.58 <sup>n</sup>      | 121.33±1.61 <sup>n</sup>         | 49.25±2.05 <sup>ab</sup>     | 12.26±0.32 <sup>abc</sup>       | 34.06±1.79 <sup>ijklm</sup> | 35.96±1.74 <sup>bcdef</sup> | 31.4±0.87 <sup>t</sup>       |
| JG28        | 66.38±1.27 <sup>hijk</sup>   | 117.42±1.28 <sup>hijklmn</sup>   | 49.75±2.18 <sup>abc</sup>    | 11.73±0.72 <sup>a</sup>         | 25.47±0.29 <sup>a</sup>     | 45.87±2.37 <sup>mno p</sup> | 18.94±0.26 <sup>fghi</sup>   |
| JG32        | 78.50±1.73 <sup>o</sup>      | 115.25±4.02 <sup>defghijkl</sup> | 69.42±3.79 <sup>mno p</sup>  | 12.56±0.24 <sup>abcde f</sup>   | 29.11±1b <sup>c</sup>       | 43.19±0.61 <sup>klmno</sup> | 17.08±0.38 <sup>cd</sup>     |
| JG33        | 59.83±1.53 <sup>abc</sup>    | 115.75±1.39 <sup>efghijklm</sup> | 65.08±2.25 <sup>ijklm</sup>  | 14.4±0.34 <sup>klmnop</sup>     | 32.83±1.17 <sup>fghij</sup> | 43.82±2.24 <sup>lmno</sup>  | 18.17±0.3 <sup>cde f g</sup> |
| JG36        | 67.67±0.76 <sup>ijklmn</sup> | 118.08±1.46 <sup>ijklmn</sup>    | 65.42±2.32 <sup>ijklmn</sup> | 12.84±0.81 <sup>abcde fgh</sup> | 42.57±1.17 <sup>s</sup>     | 30.15±1.13 <sup>a</sup>     | 17.17±0.76 <sup>cd</sup>     |
| JG42        | 62.65±1.02 <sup>cde f</sup>  | 119±3.7 <sup>lmn</sup>           | 72.25±1.8 <sup>op</sup>      | 13.11±0.4 <sup>bcde fghij</sup> | 28.38±0.82 <sup>b</sup>     | 46.17±2.33 <sup>nop</sup>   | 19.55±0.72 <sup>ghij</sup>   |
| JG6         | 61.67±1.15 <sup>cde</sup>    | 110.83±1.38 <sup>abc</sup>       | 62.58±2.47 <sup>hijkl</sup>  | 21.74±0.78 <sup>s</sup>         | 42.65±1.1 <sup>s</sup>      | 50.90±1.43 <sup>q</sup>     | 31.45±0.26 <sup>t</sup>      |
| JG63        | 69.17±0.76 <sup>klmn</sup>   | 118.5±1.8 <sup>klmn</sup>        | 63.85±0.96 <sup>ijklm</sup>  | 15.51±0.97 <sup>pqr</sup>       | 32.35±0.38 <sup>efghi</sup> | 47.98±3.17 <sup>pq</sup>    | 18.1±0.33 <sup>cde f</sup>   |
| JG74        | 70.15±2.91 <sup>mn</sup>     | 125.33±2.02 <sup>o</sup>         | 77.75±3.04 <sup>qr</sup>     | 14.06±0.82 <sup>hijklmn</sup>   | 33.42±0.69 <sup>hijkl</sup> | 42.06±3.31 <sup>ijklm</sup> | 17.49±0.72 <sup>cde</sup>    |
| PG205       | 70.82±3.49 <sup>n</sup>      | 117.25±1.89 <sup>hijklmn</sup>   | 79.75±2.77 <sup>r</sup>      | 14.77±0.54 <sup>lmnop</sup>     | 45.55±0.22 <sup>t</sup>     | 32.35±1.39 <sup>ab</sup>    | 22.31±0.39 <sup>mno</sup>    |
| <b>Mean</b> | <b>65.97±4.2</b>             | <b>115.36±3.8</b>                | <b>61.92±8.94</b>            | <b>13.77±1.85</b>               | <b>34.47±4.62</b>           | <b>40.26±5.02</b>           | <b>21.32±4.16</b>            |

Data pooled for two successive seasons and presented as mean of triplicate ± standard deviation. Means with the same letter are not significantly different at 5% level. Where, DTF, DTM, NOP, SYPP, BYPP, HI and SW indicate for days to flowering, days to maturity, number of pods, seed yield per plant, biological yield per plant, harvest index and hundred seed weight, respectively.

Supplementary Material Table S7. Yield and yield attributing trait responses of various chickpea genotypes under terminal drought stressed condition.

| Genotypes     | DTF                            | DTM                           | NOP                           | SYPP                           | BYPP                        | HI                              | SW                         |
|---------------|--------------------------------|-------------------------------|-------------------------------|--------------------------------|-----------------------------|---------------------------------|----------------------------|
| ICC4958       | 54.73±2.48 <sup>ab</sup>       | 98.13±2.31 <sup>a</sup>       | 52±0.5 <sup>kl</sup>          | 9.2±0.36 <sup>iklmno</sup>     | 28.38±1.16 <sup>hijk</sup>  | 32.51±2.37 <sup>abcdefg</sup>   | 29.82±0.28 <sup>r</sup>    |
| ICCV15102     | 61.74±1.51 <sup>efghijkl</sup> | 111.15±0.69 <sup>ijkl</sup>   | 51.4±1.95 <sup>ijkl</sup>     | 9.95±0.36 <sup>op</sup>        | 25.78±1.02 <sup>defgh</sup> | 38.65±0.31 <sup>klmno</sup>     | 23.45±0.39 <sup>o</sup>    |
| ICCV15115     | 61.46±0.29 <sup>efghijk</sup>  | 108.52±2.01 <sup>efghij</sup> | 52.08±1.76 <sup>kl</sup>      | 9.7±0.32 <sup>nop</sup>        | 27.84±0.48 <sup>hij</sup>   | 35±1.69 <sup>efghijkl</sup>     | 22.39±1.01 <sup>mno</sup>  |
| ICCV15118     | 62.65±2 <sup>efghijklm</sup>   | 108.69±0.65 <sup>efghij</sup> | 52.5±5.94 <sup>klm</sup>      | 9.54±0.58 <sup>lmno</sup>      | 23.16±0.91 <sup>bcd</sup>   | 41.15±0.89 <sup>nop</sup>       | 20.12±1.49 <sup>ijk</sup>  |
| ICCV181664    | 65.68±1.26 <sup>m</sup>        | 111.15±0.72 <sup>ijkl</sup>   | 42.58±4.46 <sup>cde</sup>     | 8.61±0.25 <sup>efghij</sup>    | 24.35±0.45 <sup>bcdef</sup> | 35.34±1.38 <sup>efghijkl</sup>  | 20.84±1.44 <sup>kl</sup>   |
| ICCV19616     | 63.07±1.87 <sup>ghijklm</sup>  | 110±0.87 <sup>efghijk</sup>   | 49.84±0.86 <sup>hijkl</sup>   | 8.36±0.33 <sup>defgh</sup>     | 22.6±0.99 <sup>bc</sup>     | 37.02±0.35 <sup>hijklmn</sup>   | 23.35±0.85 <sup>o</sup>    |
| JAKI9218      | 56.8±3.62 <sup>abcd</sup>      | 98.83±1.38 <sup>a</sup>       | 63.42±2.75 <sup>pq</sup>      | 11.25±0.45 <sup>r</sup>        | 26.04±0.84 <sup>efgh</sup>  | 43.29±2.29 <sup>p</sup>         | 28.08±0.4 <sup>q</sup>     |
| JG11          | 54.30±1.61 <sup>a</sup>        | 99.5±1.32 <sup>a</sup>        | 57.58±2.47 <sup>mno</sup>     | 11.42±0.17 <sup>r</sup>        | 27.38±0.71 <sup>ghi</sup>   | 41.91±1.61 <sup>op</sup>        | 24.83±0.84 <sup>p</sup>    |
| JG14          | 59.80±1.04 <sup>defgh</sup>    | 103.63±1.3 <sup>b</sup>       | 30.25±3.14 <sup>a</sup>       | 8.81±0.14 <sup>efghijkl</sup>  | 24.1±1.75 <sup>bcdef</sup>  | 36.68±2.78 <sup>ghijklmn</sup>  | 19.85±0.46 <sup>hij</sup>  |
| JG16          | 58.96±2.08 <sup>cdef</sup>     | 104.67±0.58 <sup>bc</sup>     | 65.25±2.6 <sup>q</sup>        | 10.29±0.55 <sup>pq</sup>       | 33.15±1.19 <sup>mn</sup>    | 31.18±2.82 <sup>abcdef</sup>    | 26.08±0.4 <sup>p</sup>     |
| JG17          | 58.30±0.29 <sup>bcde</sup>     | 108.06±2.49 <sup>defghi</sup> | 34.94±2.15 <sup>b</sup>       | 8.99±0.17 <sup>hijklmn</sup>   | 24.81±4 <sup>cdefg</sup>    | 37.01±6 <sup>hijklmn</sup>      | 16.67±0.56 <sup>cde</sup>  |
| JG2003-14-16  | 55.33±1.89 <sup>ab</sup>       | 103.52±1.22 <sup>b</sup>      | 59.53±1.98 <sup>op</sup>      | 9.56±0.08 <sup>mno</sup>       | 30.52±0.99 <sup>kl</sup>    | 31.33±1.03 <sup>abcdef</sup>    | 22.96±1.14 <sup>no</sup>   |
| JG2016-1411   | 56.91±0.95 <sup>abcd</sup>     | 106.94±2.01 <sup>cdef</sup>   | 50.4±4.07 <sup>ijkl</sup>     | 9.01±0.3 <sup>hijklmn</sup>    | 24.18±0.61 <sup>bcdef</sup> | 37.3±0.84 <sup>ijklmno</sup>    | 16.63±0.55 <sup>cde</sup>  |
| JG2016-1614   | 62.96±2.02 <sup>ghijklm</sup>  | 106.07±1.49 <sup>bcde</sup>   | 45.92±1.44 <sup>defghi</sup>  | 7.79±0.12 <sup>bcd</sup>       | 24.02±1.1 <sup>bcdef</sup>  | 32.59±1.63 <sup>abcdefghi</sup> | 14.96±1.24 <sup>ab</sup>   |
| JG2016-36     | 63.21±0.46 <sup>hijklm</sup>   | 111.02±0.78 <sup>ijkl</sup>   | 49.69±0.59 <sup>ghijkl</sup>  | 9.16±0.63 <sup>iklmno</sup>    | 22.44±0.06 <sup>bc</sup>    | 40.91±2.76 <sup>mnop</sup>      | 16.14±0.45 <sup>bc</sup>   |
| JG2016-44     | 63.07±0.92 <sup>ghijklm</sup>  | 107.88±0.6 <sup>defgh</sup>   | 46.36±1.06 <sup>defghij</sup> | 8.99±0.39 <sup>hijklmn</sup>   | 25.91±0.64 <sup>efgh</sup>  | 34.76±0.74 <sup>defghijk</sup>  | 18.69±1.16 <sup>fghi</sup> |
| JG2016-45     | 59.95±1.26 <sup>defgh</sup>    | 107.02±1.75 <sup>cdef</sup>   | 43.47±2.05 <sup>cdef</sup>    | 9.09±0.58 <sup>ijklmn</sup>    | 23.03±1.15 <sup>bc</sup>    | 39.63±4.13 <sup>lmnop</sup>     | 18.61±0.68 <sup>fgh</sup>  |
| JG2016-634958 | 59.56±2.71 <sup>defgh</sup>    | 112.19±1.66 <sup>kl</sup>     | 52.42±2.93 <sup>klm</sup>     | 8.84±0.56 <sup>efghijklm</sup> | 25.95±1.07 <sup>efgh</sup>  | 34.2±2.73 <sup>cdefghijk</sup>  | 22.32±0.46 <sup>mno</sup>  |
| JG2016-74315  | 61.42±0.68 <sup>efghijk</sup>  | 111±1.06 <sup>ijklm</sup>     | 54.31±1.4 <sup>lmn</sup>      | 8.37±0.16 <sup>defghi</sup>    | 24.01±1.48 <sup>bcdef</sup> | 34.96±2.72 <sup>efghijkl</sup>  | 18.15±0.93 <sup>fg</sup>   |
| JG2016-921814 | 61.01±2.93 <sup>efghij</sup>   | 105.19±1.08 <sup>bcd</sup>    | 45.97±0.95 <sup>defghi</sup>  | 8.56±0.62 <sup>efghij</sup>    | 24.25±0.82 <sup>bcdef</sup> | 35.39±1.78 <sup>efghijkl</sup>  | 21.82±0.49 <sup>lmn</sup>  |
| JG2016-9605   | 59.82±2.11 <sup>defgh</sup>    | 109.5±1.11 <sup>efghijk</sup> | 49.79±5.18 <sup>ghijkl</sup>  | 7.18±0.39 <sup>bc</sup>        | 23.61±0.94 <sup>bcdef</sup> | 30.47±1.38 <sup>abcde</sup>     | 20±0.67 <sup>hijk</sup>    |
| JG2016-9651   | 62.82±1.54 <sup>ghijklm</sup>  | 108.04±1.92 <sup>defghi</sup> | 53.21±2.31 <sup>klm</sup>     | 9.57±0.29 <sup>mno</sup>       | 30.55±0.63 <sup>kl</sup>    | 31.33±0.71 <sup>abcdef</sup>    | 19.49±1.06 <sup>ghij</sup> |
| JG2017-48     | 60.28±1.43 <sup>defghi</sup>   | 107.42±0.45 <sup>cdefg</sup>  | 50.69±0.77 <sup>ijkl</sup>    | 9.15±0.47 <sup>iklmno</sup>    | 25.18±0.26 <sup>cdefg</sup> | 36.4±1.92 <sup>ghijklm</sup>    | 23.24±0.87 <sup>o</sup>    |
| JG2018-51     | 65.41±1.44 <sup>lm</sup>       | 104.48±1.88 <sup>bc</sup>     | 44.58±2.34 <sup>cdefgh</sup>  | 9.48±0.28 <sup>lmno</sup>      | 31.81±0.29 <sup>lm</sup>    | 29.89±0.6 <sup>abc</sup>        | 17.86±0.72 <sup>def</sup>  |
| JG2021-1424   | 59.28±1.18 <sup>defg</sup>     | 111.29±0.73 <sup>kl</sup>     | 44.58±2.89 <sup>cdefgh</sup>  | 8.13±0.24 <sup>def</sup>       | 24.09±0.53 <sup>bcdef</sup> | 33.79±0.9 <sup>cdefghij</sup>   | 16.57±0.91 <sup>cd</sup>   |
| JG2021-1617   | 54.59±1.28 <sup>a</sup>        | 110.82±2.78 <sup>hijkl</sup>  | 47.58±4.25 <sup>efghijk</sup> | 7.34±0.37 <sup>bc</sup>        | 23.45±0.06 <sup>bcde</sup>  | 31.39±1.44 <sup>abcdef</sup>    | 17.69±0.1 <sup>def</sup>   |
| JG2021-6301   | 64.74±0.98 <sup>ijklm</sup>    | 113.17±0.38 <sup>lm</sup>     | 49.19±4 <sup>ghijkl</sup>     | 8.75±0.33 <sup>efghijk</sup>   | 28.12±0.74 <sup>hijk</sup>  | 31.15±0.55 <sup>abcdef</sup>    | 13.77±1.19 <sup>a</sup>    |
| JG2022-74     | 64.23±1.93 <sup>ijklm</sup>    | 110.29±2.85 <sup>ghijkl</sup> | 48.69±2.2 <sup>efghijkl</sup> | 7.24±0.13 <sup>bc</sup>        | 22.63±0.2 <sup>bc</sup>     | 32.14±0.69 <sup>abcdefg</sup>   | 20.04±0.82 <sup>hijk</sup> |
| JG2022-75     | 64.75±0.89 <sup>ijklm</sup>    | 111.02±1.47 <sup>ijkl</sup>   | 50.14±0.67 <sup>hijkl</sup>   | 7.87±0.44 <sup>cde</sup>       | 28.36±3.14 <sup>hijk</sup>  | 28.37±3.93 <sup>a</sup>         | 18.6±0.69 <sup>fgh</sup>   |
| JG226         | 60.28±1.74 <sup>defghi</sup>   | 106±1.7 <sup>bcde</sup>       | 48.26±2.91 <sup>efghijk</sup> | 8.62±0.18 <sup>efghij</sup>    | 28.73±1.15 <sup>ijk</sup>   | 30.06±1.64 <sup>abcd</sup>      | 21.35±0.84 <sup>klm</sup>  |

|             |                                |                               |                            |                              |                             |                                 |                            |
|-------------|--------------------------------|-------------------------------|----------------------------|------------------------------|-----------------------------|---------------------------------|----------------------------|
| JG24        | 65.13±0.5 <sup>klm</sup>       | 115.23±0.78 <sup>m</sup>      | 41.93±4.99 <sup>cd</sup>   | 8.15±0.22 <sup>defg</sup>    | 24.35±1.68 <sup>bcdef</sup> | 33.59±2.28 <sup>bcdefghij</sup> | 30.54±0.3 <sup>r</sup>     |
| JG28        | 62.13±1.8 <sup>fghijklm</sup>  | 110.31±0.29 <sup>ghijkl</sup> | 43.61±3.05 <sup>cdef</sup> | 7.88±0.08 <sup>cde</sup>     | 24.29±2.69 <sup>bcdef</sup> | 32.77±3.7 <sup>abcdefghi</sup>  | 18.05±0.47 <sup>efg</sup>  |
| JG32        | 74.91±1.55 <sup>n</sup>        | 109.44±2.69 <sup>fghijk</sup> | 50.34±3.1 <sup>ijkl</sup>  | 8.66±0.29 <sup>fghij</sup>   | 23±2.63 <sup>bc</sup>       | 38.06±4.72 <sup>klmno</sup>     | 16.02±0.65 <sup>bc</sup>   |
| JG33        | 55.67±1.79 <sup>abc</sup>      | 108.27±0.25 <sup>efghij</sup> | 39.19±0.42 <sup>bc</sup>   | 8.67±0.07 <sup>fghij</sup>   | 22.56±0.26 <sup>bc</sup>    | 38.62±0.87 <sup>klmno</sup>     | 14.94±0.42 <sup>ab</sup>   |
| JG36        | 62.35±1.85 <sup>fghijklm</sup> | 112.23±0.81 <sup>kl</sup>     | 54.26±2.79 <sup>lmn</sup>  | 9.13±0.4 <sup>ijklmno</sup>  | 32.54±0.14 <sup>lmn</sup>   | 28.18±1.22 <sup>a</sup>         | 15.98±0.19 <sup>bc</sup>   |
| JG42        | 59.90±0.25 <sup>defgh</sup>    | 112.54±2.49 <sup>klm</sup>    | 44.2±1.6 <sup>cdefg</sup>  | 8.87±0.45 <sup>ghijklm</sup> | 21.96±0.81 <sup>ab</sup>    | 40.87±3.55 <sup>mnop</sup>      | 18.73±0.81 <sup>fghi</sup> |
| JG6         | 56.96±1.53 <sup>abcd</sup>     | 100.15±3.28 <sup>a</sup>      | 42.1±2.31 <sup>cde</sup>   | 9.43±0.59 <sup>klmno</sup>   | 30.1±0.83 <sup>kl</sup>     | 31.33±1.2 <sup>abcdef</sup>     | 30.56±0.7 <sup>r</sup>     |
| JG63        | 61.80±3.82 <sup>efghijkl</sup> | 112.04±0.79 <sup>kl</sup>     | 58.47±3.97 <sup>nop</sup>  | 10.63±0.39 <sup>q</sup>      | 26.23±2.35 <sup>fghi</sup>  | 40.85±5.03 <sup>mnop</sup>      | 17.88±0.45 <sup>def</sup>  |
| JG74        | 64.02±3.96 <sup>ijklm</sup>    | 119.42±1.06 <sup>n</sup>      | 41.53±4.18 <sup>cd</sup>   | 6.14±0.33 <sup>a</sup>       | 19.93±0.35 <sup>a</sup>     | 30.86±1.11 <sup>abcdef</sup>    | 15.85±0.52 <sup>bc</sup>   |
| PG205       | 65.52±3.8 <sup>lm</sup>        | 110.94±1.76 <sup>hijkl</sup>  | 62.67±2.54 <sup>pq</sup>   | 10±0.38 <sup>opq</sup>       | 34.77±1.8 <sup>n</sup>      | 28.85±0.51 <sup>ab</sup>        | 22.31±0.31 <sup>mno</sup>  |
| <b>Mean</b> | <b>61.14±4.22</b>              | <b>108.39±4.58</b>            | <b>49.12±7.57</b>          | <b>8.91±1.09</b>             | <b>25.95±3.59</b>           | <b>34.74±4.53</b>               | <b>20.38±4.31</b>          |

Data pooled for two successive seasons and presented as mean of triplicate ± standard deviation. Means with the same letter are not significantly different at 5% level. Where, DTF, DTM, NOP, SYPP, BYPP, HI and SW indicate for days to flowering, days to maturity, number of pods, seed yield per plant, biological yield per plant, harvest index and hundred seed weight, respectively.

Supplementary Material Table S8. PC Scores of studied chickpea genotypes under terminal drought stressed condition.

| Row Names | Genotype     | PC1      | PC2      | PC3      |
|-----------|--------------|----------|----------|----------|
| 1         | ICC4958      | -6.50136 | -2.87579 | 1.426453 |
| 2         | JAKI9218     | -6.95491 | -1.55947 | 2.531589 |
| 3         | JG6          | 0.736056 | 3.502651 | 4.526591 |
| 4         | JG11         | -7.10434 | -2.39003 | 2.021287 |
| 5         | JG14         | 2.071282 | 1.543937 | 1.063758 |
| 6         | JG16         | -6.1469  | -0.80386 | 0.428306 |
| 7         | JG17         | 1.694379 | -0.36306 | 1.124941 |
| 8         | JG24         | -1.37694 | 3.774933 | -0.16164 |
| 9         | JG28         | 0.943795 | 1.750512 | 0.221353 |
| 10        | JG32         | 0.559676 | 1.732257 | -0.30897 |
| 11        | JG33         | 1.039403 | -0.06702 | 0.194738 |
| 12        | JG36         | 0.331787 | 1.18546  | -2.09284 |
| 13        | JG42         | 0.027835 | 0.753473 | -0.43298 |
| 14        | JG63         | -5.16651 | -0.91593 | -1.55699 |
| 15        | JG74         | 3.263057 | 4.519903 | 0.573507 |
| 16        | JG226        | 0.514748 | 3.562517 | -0.59633 |
| 17        | PG205        | -4.71269 | 1.051679 | -3.60294 |
| 18        | ICCV15102    | -0.86241 | -0.94224 | 1.493535 |
| 19        | ICCV15115    | -1.90485 | 1.498351 | -1.24874 |
| 20        | ICCV15118    | -1.1294  | 0.892493 | -1.1424  |
| 21        | ICCV19616    | 0.057233 | -0.96645 | 0.723528 |
| 22        | ICCV181664   | -0.55892 | 1.784882 | -0.95072 |
| 23        | JG2003-14-16 | -1.36355 | 1.091568 | 0.766214 |
| 24        | JG2016-44    | -1.33749 | 2.587296 | -1.89926 |
| 25        | JG2016-45    | 2.362902 | -1.17754 | 1.555341 |
| 26        | JG2016-1411  | -0.91501 | 1.959239 | -0.62536 |
| 27        | JG2016-1614  | 3.072646 | -1.78623 | 0.537604 |
| 28        | JG2016-9605  | 4.610555 | 0.199801 | 3.090113 |
| 29        | JG2016-9651  | 1.180432 | -1.41177 | -1.51808 |

|    |               |          |          |          |
|----|---------------|----------|----------|----------|
| 30 | JG2016-74315  | 1.566116 | -1.69197 | -0.36157 |
| 31 | JG2016-634958 | -0.08124 | 0.577337 | -0.34197 |
| 32 | JG2016-921814 | 0.555114 | 0.087732 | 0.536136 |
| 33 | JG2017-48     | 1.83566  | -2.49895 | 0.378646 |
| 34 | JG2018-51     | 0.591004 | -1.3204  | -1.3054  |
| 35 | JG2022-74     | 3.664413 | -1.16636 | 0.131153 |
| 36 | JG2016-36     | 3.775852 | -2.86033 | 0.000473 |
| 37 | JG2022-75     | 4.142539 | -2.45586 | -0.77306 |
| 38 | JG2021-6301   | 2.036668 | -2.71955 | -2.99602 |
| 39 | JG2021-1424   | 2.14995  | -1.28625 | -0.95101 |
| 40 | JG2021-1617   | 3.333416 | -2.79695 | -0.45899 |
